# Cannabinoid Receptor CB<sub>2</sub> Modulates Axon Guidance

Gabriel Duff<sup>1,2,3</sup>, Anteneh Argaw<sup>1,3</sup>, Bruno Cecyre<sup>1</sup>, Hosni Cherif<sup>1</sup>, Nicolas Tea<sup>1</sup>, Nawal Zabouri<sup>1</sup>, Christian Casanova<sup>1</sup>, Maurice Ptito<sup>1</sup>, Jean-François Bouchard<sup>1,2\*</sup>

**1** School of Optometry, University of Montreal, Montreal, Quebec, Canada, **2** Faculty of Pharmacy, University of Montreal, Montreal, Quebec, Canada, **3** Department of Biomedical Science, Faculty of Medicine, University of Montreal, Montreal, Quebec, Canada

## Abstract

Navigation of retinal projections towards their targets is regulated by guidance molecules and growth cone transduction mechanisms. Here, we present *in vitro* and *in vivo* evidences that the cannabinoid receptor 2 (CB<sub>2</sub>R) is expressed along the retino-thalamic pathway and exerts a modulatory action on axon guidance. These effects are specific to CB<sub>2</sub>R since no changes were observed in mice where the gene coding for this receptor was altered (*cnr2*<sup>-/-</sup>). The CB<sub>2</sub>R induced morphological changes observed at the growth cone are PKA dependent and require the presence of the netrin-1 receptor, Deleted in Colorectal Cancer. Interfering with endogenous CB<sub>2</sub>R signalling using pharmacological agents increased retinal axon length and induced aberrant projections. Additionally, *cnr2*<sup>-/-</sup> mice showed abnormal eye-specific segregation of retinal projections in the dorsal lateral geniculate nucleus (dLGN) indicating CB<sub>2</sub>R's implication in retinothalamic development. Overall, this study demonstrates that the contribution of endocannabinoids to brain development is not solely mediated by CB<sub>1</sub>R, but also involves CB<sub>2</sub>R.

**Citation:** Duff G, Argaw A, Cecyre B, Cherif H, Tea N, et al. (2013) Cannabinoid Receptor CB<sub>2</sub> Modulates Axon Guidance. PLoS ONE 8(8): e70849. doi:10.1371/journal.pone.0070849

**Editor:** Alain Chédotal, Institut de la Vision, France

**Received:** June 4, 2012; **Accepted:** June 28, 2013; **Published:** August 9, 2013

**Copyright:** © 2013 Duff et al. This is an open-access article distributed under the terms of the Creative Commons Attribution License, which permits unrestricted use, distribution, and reproduction in any medium, provided the original author and source are credited.

**Funding:** This work is supported by grants to JFB from the Canadian Institutes of Health Research (CIHR, MOP-86495) and National Sciences and Engineering Research Council of Canada (NSERC, 311892-2010). AA was supported by a doctoral research award from E.A. Baker Foundation and The Institute of Neuroscience, Mental Health and Addiction (INMHA) of the CIHR. GD was supported by a fellowship from the Fonds de recherche en santé du Québec (FRSQ). JFB is a scholar Junior 2 of the FRSQ. The funders had no role in study design, data collection and analysis, decision to publish, or preparation of the manuscript.

**Competing Interests:** The authors have declared that no competing interests exist.

\* E-mail: Jean-Francois.Bouchard@umontreal.ca

† These authors contributed equally to this work.

## Introduction

The endogenous cannabinoid system comprises the endocannabinoids (eCBs), the enzymes involved in their synthesis and degradation, and their receptors [1]. Type 1 (CB<sub>1</sub>R) and type 2 (CB<sub>2</sub>R) are the principal receptors characterized so far [2]. CB<sub>2</sub>R was first observed in peripheral and immune tissues [3] and there are increasing evidences that it is also expressed in neurons. For example, CB<sub>2</sub>R are found in mouse cerebellum [4] as well as in rat dorsal root ganglia neurons and neuronal progenitors [5,6]. The presence of CB<sub>2</sub>R was also reported in brainstem, cerebellar and hippocampal pyramidal neurons of adult mammals [7,8]. Moreover, this receptor [9] and its mRNA [10] have also been reported in the adult rat retina. There is no evidence as yet of its expression in the developing neurovisual system.

In 2000, Fernandez-Ruiz *et al* proposed that the eCB system is involved in numerous processes regulating the development of the Central Nervous System (CNS) [11]. eCBs, through CB<sub>1</sub>R, modulate pyramidal cell progenitor proliferation and immature pyramidal cell migration. Furthermore, CB<sub>1</sub>R deletion causes deficits in pyramidal cell fasciculation [12]. Deficiencies in fasciculation and axonal growth have also been reported following pharmacological activation of CB<sub>1</sub>R in chick, and gene knock-down in zebrafish [13]. Its role in axon guidance has been shown in GABAergic interneurons, where its activation induced growth cone collapse resulting in chemorepulsion [14]. Recently, we demonstrated that CB<sub>1</sub>R modulates retinal projection axon guidance and development [15]. Although the implication of

CB<sub>2</sub>R in proliferation, differentiation and survival of neuronal cells is well documented [16–18], no emphasis has been put on its putative role on axon guidance during CNS development. Because eCB levels fluctuate in the brain during development [19] and since the presence of CB<sub>2</sub>R has been reported in the developing CNS, it is plausible to speculate that eCBs, via CB<sub>2</sub>R, affect axonal navigation.

During the development of the visual system, Retinal Ganglion Cell (RGC) axons navigate from the retina to their thalamic and midbrain targets. In rodents, they steer towards the optic chiasm where the majority of axons decussate to reach the contralateral side while a small contingent remains ipsilaterally. When axons reach their main targets, namely the dLGN and the superior colliculus (SC), they form synaptic connections [20].

Our study indicates that the pharmacological and genetic manipulations of CB<sub>2</sub>R activity affect RGC growth and retinothalamic development. Importantly and similar to CB<sub>1</sub>R, CB<sub>2</sub>R-induced reorganization of the growth cone implicates the cAMP/PKA pathway and the DCC receptor. The present study is the first demonstration that CB<sub>2</sub>R is expressed in the developing visual system and that it plays a role in axon guidance and brain wiring.

## Materials and Methods

Protocols for animal experimentation were approved by the *Comité de déontologie de l'expérimentation sur les animaux* of the University of Montreal (Permit numbers: 12–071, 12–080, and 12–081) and

handled in accordance to the Canadian Council on Animal Care recommendations.

## Reagents

Antibody raised against GAPDH, Bovine serum albumin (BSA), ciliary neurotrophic factor (CNTF), dibutyryl cAMP (db-cAMP), DNase, dextran-FITC, forskolin (FSK), Hoechst 33258, insulin, KT5720, laminin, rabbit polyclonal anti-CB<sub>1</sub>R, monoclonal anti- $\beta$ -actin, monoclonal anti-MAP Kinase (Diphosphorylated Erk-1&2), poly-D-lysine, progesterone, putrescine, selenium, apo-transferrin, triiodo-thyronine, and trypsin were purchased from Sigma (Oakville, ON). Rabbit anti-mouse macrophage and mouse anti-Thy-1.2 monoclonal IgM ( $\mu$  chain specific) were obtained from Accurate Chemical (Westbury, NY). B27, Dulbecco's Phosphate-Buffered Saline (DPBS), Fetal Bovine Serum (FBS), glutamine, N2, neurobasal media, penicillin-streptomycin, S-MEM and sodium pyruvate were bought from Invitrogen Canada (Burlington, ON). Antibodies directed against NCAM, neurofilament-L, p-AKT (ser473), AKT, p-S6 (ser235/236), S6, p-PKA C (thr197), and PKA C- $\alpha$  were from Cell Signaling Tech (Beverly, MA). Normal donkey serum (NDS) and normal goat serum (NGS) were purchased from Jackson Immuno (West Grove, PA). Shandon ImmuMount was bought from Thermo Scientific (Pittsburgh, PA). AM630, JTE907, JWH015, and JWH133 were acquired from Tocris Bioscience (Ellisville, MI). Primary antibodies raised against Brn3a, GAP-43, p-ERK1/2, ERK1/2, and cAMP were from Chemicon International (Temecula, CA). Monoclonal DCC antibodies against extracellular (DCC<sub>EX</sub>, G92-13) or intracellular (DCC<sub>IN</sub>, G97-449) epitopes of DCC were obtained from PharMingen (Mississauga, ON, Canada). Anti-DCC<sub>FB</sub> AF5, H89, LNAC, LY294002 and rapamycin were purchased from EMD (La Jolla, CA). Primary antibody against L1 and alexa fluor conjugated secondary antibodies (Alexa-488 and Alexa-546) were obtained from Invitrogen. Avidin-biotin-peroxidase complex ABC Kit, 3,3'-diaminobenzidine tetrahydrochloride (DAB)-Nickel, and donkey anti-goat biotinylated secondary antibody were from Vector Labs (Burlingame, CA). The B fragment of the cholera toxin (CTb) and goat anti-CTb were from List Biological Laboratories (Campbell, CA). Rabbit polyclonal anti-CB<sub>2</sub>R, its blocking peptide (human CB<sub>2</sub>R amino acid sequence 20–33 (NPMKDYMILSGPQK)), and rabbit polyclonal anti-MGL were purchased from Cayman (Ann Arbor, Michigan). Goat polyclonal anti-CB<sub>2</sub>R was obtained from Santa Cruz Biotechnology (Santa Cruz, CA). The monoclonal anti-Netrin 1 (MAB1109) was purchased from R&D Systems (Minneapolis, MN) and the polyclonal anti-Netrin 1 (PN2) was kindly provided by Pr. Timothy Kennedy (Montreal Neurological Institute, Montreal, QC). Anti-NAPE-PLD and anti-DAGL $\alpha$  were kind gifts from Ken Mackie (Department of Psychological & Brain Sciences, Indiana University, Bloomington, IN).

## Purified Retinal Ganglion Cell Culture

Retinal ganglion cells (RGC) from P7-P8 mice (Charles River, St-Constant, QC) were purified and cultured according to a protocol previously described by Barres *et al.* [21]. In brief, following enucleation, retinas were dissected and enzymatically dissociated, at 37°C for 30 min, in a papain solution (15 U/ml in DPBS) containing 1 mM L-cysteine. The retinas were then triturated sequentially, with a 1 ml pipette, in a solution containing ovomucoid (1.5 mg/ml), DNase (0.004%), BSA (1.5 mg/ml) and rabbit antibodies directed against mouse-macrophage (1:75) to yield a suspension of single cells. The suspension was then centrifuged and washed in a high concentration ovomucoid-BSA solution (10 mg/ml for each in DPBS). The dissociated cells were

resuspended in DPBS containing BSA (0.2 mg/ml) and insulin (5  $\mu$ g/ml).

RGCs were purified using the two-step panning procedure [21,22]. Briefly, to remove macrophages, the retinal suspension was incubated at room temperature in petri dishes coated with affinity-purified goat anti-rabbit IgG (H+L). The nonadherent cells were then transferred to a petri dish that had been coated with affinity purified goat anti-mouse IgM ( $\mu$  chain specific) followed by anti-Thy-1.2 monoclonal IgM. The adherent RGCs were first released enzymatically by incubating them in a 0.125% trypsin solution at 37°C and 5% CO<sub>2</sub> followed by manually pipetting an enzyme inhibitor solution (30% FBS in Neurobasal) along the surface of the dish.

Purified RGCs were plated on poly-D-lysine (10  $\mu$ g/ml) and laminin (5  $\mu$ g/ml) coated glass coverslips (number 0 Deckgläser; Carolina Biological, Burlington, NC) in 24-well plates. RGCs were cultured in 600  $\mu$ l of serum-free medium modified from Bottenstein and Sato [23]. Neurobasal media was supplemented with B27, selenium, putrescine, triiodo-thyronine, transferrin, progesterone, pyruvate (1 mM), glutamine (2 mM), ciliary neurotrophic factor (CNTF; 10 ng/ml), brain-derived neurotrophic factor (BDNF; 50 ng/ml), insulin (5  $\mu$ g/ml), and FSK (10  $\mu$ M). RGCs were cultured at 37°C and 5% CO<sub>2</sub>.

## Primary Neuron Culture

Staged pregnant mice were obtained from Charles River (St-Constant, QC). E14–15 mouse embryo cortices were isolated surgically and transferred in a vial containing 2 ml S-MEM at 37°C supplemented with 2.5% trypsin and 2 mg/ml DNase for 15 minutes. The pellet was then transferred into 10 ml S-MEM with cold 10% FBS and stored at 4°C. Following centrifugation, pellet was transferred in 2 ml S-MEM with 10% FBS and triturated 3 or 4 times to yield to a suspension of single neurons. Then, 10 ml of Neurobasal medium was added to this suspension. Dissociated cells were counted and plated on 12 mm poly-D-lysine treated glass coverslips (20  $\mu$ g/ml; 50 000 cells/well). Cells were cultured for 2 days *in vitro* (DIV2) in Neurobasal medium containing 1% B-27, 100 U/ml penicillin, 100  $\mu$ g/ml streptomycin, 0.25% N2 and 0.5 mM glutamine for growth cone analysis. Then, neurons were treated with, either CB<sub>2</sub>R agonists (300 nM JWH133 or JWH015), CB<sub>2</sub>R inverse agonists (300 nM AM630 or JTE907), adenylate cyclase activator (10  $\mu$ M FSK), PKA inhibitors (200 nM KT5720 or 2  $\mu$ M H89) or DCC function blocking (3.5  $\mu$ g/ml anti-DCC<sub>FB</sub> AF5) for 1 hour for growth cone morphology experiments or for 15 minutes for cAMP immunocytochemistry.

## Retinal Explant Culture

E14–15 mouse embryo retinas were isolated and dissected in small segments in ice cold DPBS and plated in 24 well plates on 12 mm poly-D-Lysine (20  $\mu$ g/ml) and laminin (5  $\mu$ g/ml) treated glass coverslips. Explants were cultured in Neurobasal supplemented with 100 U/ml penicillin, 100  $\mu$ g/ml streptomycin, 5  $\mu$ g/ml LNAC, 1% B27, 40 ng/ml selenium, 16  $\mu$ g/ml putrescine, 0.04 ng/ml triiodo-thyronine, 100  $\mu$ g/ml transferrin, 60 ng/ml progesterone, 100  $\mu$ g/ml BSA, 1 mM sodium pyruvate, 2 mM glutamine, 10 ng/ml ciliary neurotrophic factor (CNTF), 5  $\mu$ g/ml insulin, and 10  $\mu$ M FSK. Explants were treated for 15 hours at DIV0 (1 hour following plating) for outgrowth analysis or for 1 hour at DIV1 for growth cone analysis assay. Photomicrographs for outgrowth analysis were taken using an Olympus BX51WI microscope (Olympus Canada, Markham, ON) with a 10X objective lens and analyzed using Image Pro Plus 5.1 software (Media Cybernetics, Bethesda, MD). The total length of axon bundles was quantified and expressed as mean  $\pm$  SEM. Statistical

significance of differences between means was evaluated by analysis of variance (ANOVA) with Bonferroni's *post hoc* test (Systat).

### Immunocytochemistry

Plates were washed with cold PBS (pH 7.4) and fixed in 4% paraformaldehyde in PBS for 10 minutes. Primary neuron and retinal explants cultures were blocked in 2% NGS and 2% BSA in PBS during 30 minutes at room temperature. Antibodies were added overnight in a blocking solution at the following concentrations: anti-GAP-43 1:1,000, anti-CB<sub>2</sub>Rsc 1:100, anti-CB<sub>2</sub>Rcayman 1:500, anti-MGL 1:500, anti-L1 1:500, anti-cAMP 1:1,000, anti-β-actin 1:1,000, anti-NFL 1:500, anti-NAPE-PLD 1:200, anti-DAGLα 1:200, anti-DCC<sub>IN</sub> 1:500. The following day, the neurons or explants were washed with PBS-tween (PBST), incubated with secondary antibodies Alexa 488 or 546 for 2 hours at room temperature. Nuclei were labeled with Hoechst 33258 and coverslips were mounted with ImmuMount (Thermo Scientific, Pittsburgh, PA).

### Quantification of cAMP Immunoreactivity

All photomicrographs used for quantification were taken using an inverted Olympus IX71 microscope (Olympus Canada, Markham, ON) with a 60X objective lens and identical exposure time to allow for comparison of measurements. Fluorescence intensity at the growth cone was corrected for background noise and quantified using Image Pro Plus 5.1 software. For growth cone analysis, both Differential Interference Contrast (DIC) and fluorescent images were taken. Fluorescence intensity per squared micrometer is expressed as the mean ± SEM. Statistical significance was evaluated by analysis of variance (ANOVA) with Bonferroni's *post hoc* test (Systat).

### Western Blots

Hamster pups were sacrificed at various ages, namely: P1, 3, 5. They were deeply anesthetized by hypothermia. Eyes were immediately removed for Western blot analysis. The retinas were dissected on ice, homogenized by hand using a sterile pestle in RIPA lysis buffer, supplemented with a protease inhibitor mixture (aprotinin, leupeptin, pepstatin, and phenylmethylsulfonyl fluoride (PMSF)). Samples were then centrifuged at 13,000 rpm at 4°C for 10 min and the supernatant was extracted and stored. Protein contents were equalized using a BCA Protein Assay kit (Thermo Scientific, Fischer scientific, Ottawa, ON). In another set of experiments, dissociated mouse primary neurons were cultured for 2 DIVs at a density of approximately 250,000 cells/dish in 35 mm poly-D-lysine coated dish. After 10-minute treatment with CB<sub>2</sub>R agonists (300 nM JWH133 or JWH015), CB<sub>2</sub>R inverse agonists (300 nM AM630 or JTE907), or adenylyl cyclase activator (10 μM FSK), neurons were washed once with ice-cold PBS and lysed with Laemmli sample buffer. Western blot analysis was performed using anti-CB<sub>2</sub>Rcayman 1:1,000, anti-CB<sub>1</sub>R 1:1,000, anti-β-actin 1:5,000, anti-GAPDH 1:20,000, anti-p-PKA C 1:1,000, anti-PKA Cα 1:1,000, anti-DCC<sub>IN</sub> 1:2,000, anti-NCAM 1:5,000, anti-ERK1/2 1:5,000, anti-p-ERK1/2 1:2,000, anti-AKT 1:1,000, anti-p-AKT 1:1,000, anti-S6 1:2,000, anti-p-S6 1:2,000 overnight at 4°C. Results were visualized using the Western Lighting Chemiluminescence Reagent Plus kit (Perkin-Elmer, Boston, MA, USA). Immunoreactivity was imaged with a ScanJet 5300C (Hewlett Packard Canada, Mississauga, ON, Canada).

### Surface Biotinylation

E14–15 neurons were plated and cultured for 2 days at a density of 2,000,000 cells per 100 mm PDL-coated tissue culture dish. On day 2, cells were treated with CB<sub>2</sub>R inverse agonists (300nM AM630 or JTE907), PKA inhibitors (200 nM KT5720 or 2 μM H89), adenylyl cyclase activator (10 μM FSK), or vehicle for 15 min. Neurons were then washed with ice-cold PBS containing 0.1 mM calcium chloride and 1 mM magnesium chloride, pH 7.4, to halt protein trafficking. Surface biotinylation was performed by adding EZ-Link Sulfo-NHS-LC-biotin (Thermo Scientific, Rockford, IL), 5 ml per plate at 0.5 mg/ml in PBS at 4°C for 30 min, removed, and the reaction was quenched by the addition of 5 ml of 10 mM ice-cold glycine in PBS at 4°C for two 10 min periods. Subsequently, neurons were washed twice with 5 ml of ice-cold PBS and lysed with RIPA buffer. Biotinylated proteins were precipitated with streptavidin–agarose (Thermo Scientific) and analyzed by Western blot.

### Growth Cone Behavior Assay

Retinal explants were cultured in borosilicate-chambered coverglass (Lab-Tek; Rochester, NY). At DIV1, explants were installed in a Live Cell chamber (5% CO<sub>2</sub>, 37°C) (Neue Bioscience, Camp Hill, PA) mounted to an inverted Olympus IX71 microscope. Glass micropipettes with an orifice of 2–3 μm diameter were positioned at 45° and 100 μm away from the growth cone of interest. A concentration gradient was created using a micro-injector (Picoplus, Harvard Apparatus - Model 702213).

### Intraocular Injections

Syrian golden hamsters (Charles River, St-Constant, QC) were used for intraocular injections. These mammals are born with a relatively premature nervous system [24]. Compared with rats and mice, hamsters have a shorter gestation period. The gestation periods are 21.5, 18.5 and 15.5 days for rats, mice and hamsters, respectively [24]. The neural events that characterize the development of the mouse and hamster nervous system, including the neuro-visual system, occur at almost identical time points of embryonic development [24]. For example, RGC generation starts at E9.5 for hamsters and E10.5 for mice while the dLGN starts to develop at E10.5 for both models [24,25]. At birth (postnatal day 0, P0), RGC axons have not all reached their thalamic and midbrain targets in hamster. By P3, virtually all RGC axons have reached their targets [26]. To take advantage of this opportunity, 1 day after birth (P1), hamsters received a 2 μl unilateral injection of a 1% solution of the beta subunit of the cholera toxin coupled to FITC (CTb-FITC), a highly sensitive anterograde tracer, in either 0.9% saline solution, 300 μM JWH133 (CB<sub>2</sub>R agonist) or 300 μM AM630, a CB<sub>2</sub>R inverse agonist. Briefly, under an operating microscope, a small incision was made in the eyelids to access the right eye; the injections were administered using a glass micropipette attached to a 10 μl Hamilton syringe. The micropipette was carefully inserted into the vitreous at an angle to avoid damaging the lens. Following the injection, the eyelids were closed with surgical glue (Vetbond; 3 M, St-Paul, MN). The same surgical procedures were performed using adult mice where the gene coding for the CB<sub>2</sub>R was genetically modified to produce non-functional CB<sub>2</sub>R (*cnr2*<sup>-/-</sup>). In these series of experiments, adult mice (*cnr2*<sup>-/-</sup> and their wildtypes (*cnr2*<sup>+/+</sup>) were injected in the right eye with the CTb-Alexa-546 and the left one received an injection of CTb-Alexa-488. Four days following the injections, animals were perfused transcardially with 0.1 M PBS followed by 4% paraformaldehyde in PBS. The brains were removed, postfixed overnight at 4°C, cryoprotected by

infiltration of buffered sucrose, flash frozen and kept at  $-80^{\circ}\text{C}$  until further processing.

### Immunohistochemistry

The presence of the CB<sub>2</sub>R during early postnatal development was investigated by immunohistochemistry. The RGCs were labeled with Brn3a. Retinal sections were washed in 0.1 M PBS, post fixed for 5 minutes in a 70% solution of ethanol, rinsed in 0.03% Triton X-100 buffered saline and blocked in 10% normal donkey serum (NDS, Jackson immunoresearch laboratories, West Grove, PA) and 0.5% Triton X-100 in buffered saline for 1 h. The sections were then co-incubated overnight in rabbit anti-CB<sub>2</sub>R (1:200, Cayman) solution with a mouse anti-Brn3a. After incubation with the primary antibodies, the sections were washed in buffered saline, blocked for 30 minutes and incubated for 1 h with secondary antibodies: Alexa donkey anti-rabbit 555 for CB<sub>2</sub>R and Alexa donkey anti-mouse 488 for syntaxin (Molecular Probes, Eugene, OR). After washes in buffered saline, the sections were mounted with a homemade PVA-Dabco mounting medium [27]. Photomicrographs were taken using a Leica TCS SP2 laser scanning confocal microscope (Leica Microsystems, Exton, PA). Images were captured in the Alexa fluo 555/546 and Alexa fluo 488/FITC channels, pseudo-colored, merged and exported using Leica LCS software (version 2.61). The pictures were taken sequentially to ensure no ‘Bleed-through’ between channels.

The presence of the CB<sub>2</sub>R in the hamster neuro-visual brain (dLGN, SC, and visual cortex) was also assessed using immunohistochemistry. Forty  $\mu\text{m}$  thick coronal sections of tissue comprising the dLGN, SC or visual cortex were pre-incubated for 20 min at room temperature in PBS 0.1 M containing 0.3% hydrogen peroxide, followed by 1 h in PBS containing 0.3% Triton X-100 and 3% Normal Donkey Serum. The sections were then incubated for 48 h at  $4^{\circ}\text{C}$  in the blocking solution (PBS 0.3% Triton X-100 with 0.5% Donkey Serum) containing rabbit anti-CB<sub>2</sub>R (1:200). Subsequently, sections were rinsed and immersed in a blocking solution for 30 min. Sections were then incubated in a blocking solution containing donkey anti-rabbit biotinylated secondary antibody (1:200) for 2 h and then for 1 h in the avidin-biotin complex (ABC Elite). After each incubation step, rinses were carried out in PBS containing 0.3% Triton. A peroxidase-substrate kit Vector DAB-Nickel was used to develop the reaction product during a period of 4 min. Sections were then mounted onto slides, dehydrated and coverslipped with Permount. Photographs were taken with a microscope by MicroBrightField digital system (Williston, VT).

The effects of intraocular injection of CB<sub>2</sub>R agonist and inverse agonist were visualized by immunohistochemistry according to a protocol previously described [28]. Briefly, 40  $\mu\text{m}$  thick coronal sections of tissue were incubated in 90% methanol and 0.3% H<sub>2</sub>O<sub>2</sub> in PBS for 20 min. After several washes, they were incubated in 0.1 M glycine solution for 30 min, and then blocked overnight at  $4^{\circ}\text{C}$ . Sections were subsequently rinsed and immersed for 48 h at room temperature in a solution-containing goat 1:4000 anti-CTb diluted in blocking solution. Afterwards, sections were rinsed and incubated 1 h with a biotinylated donkey secondary antibody directed against goat diluted in blocking solution (1:200). Tissue was rinsed and subsequently processed using an avidin-biotin-peroxidase complex ABC Kit (1:100) for 1 h, in the dark and at room temperature. Sections were then rinsed and preincubated in DAB/PBS for 5 min. The peroxidase was visualized by adding 0.004% H<sub>2</sub>O<sub>2</sub> to the DAB solution for 5–10 min. Sections were finally washed five times with PBS, mounted on gelatin-chrome alum-subbed slides, air-dried, dehydrated in ethanol, cleared in xylene, and coverslipped with Depex

(EMS, Hatfield, PA). Photomicrographs were taken with an Olympus BX51WI microscope (Olympus Canada, Markham, ON) using a 10X objective lens. Images were analyzed with Image Pro Plus 5.1 software.

### Retinothalamic and Retinogeniculate Projection Analyses

Axon branch growth was quantified on consecutive photomicrographs of coronal slices of brain tissue, as described previously [28], comprising the lateral terminal nucleus. Briefly, the distance between the lateral border of the nucleus of interest and the tips of the longest axon branches was measured and normalized for interthalamic distance. Axon collateral density was also quantified for the lateral terminal nucleus using an adaptation of the Sholl technique [29]. Values are expressed as the mean  $\pm$  SEM. Statistical significance means was evaluated by analysis of variance (ANOVA) with Sheffe’s post hoc test (Systat).

For eye specific segregation studies in the dLGN, *cnr2*<sup>-/-</sup> and *cnr2*<sup>+/+</sup> adult mice were injected with the B fragment of the cholera toxin (CTb) conjugated to Alexa -546 (CTb-546; red) into the left eye and CTb-488 (green) into the right eye (1.5–2  $\mu\text{l}$ ; 0.5% in sterile saline). Forty-eight hours later, brain tissue was harvested and postfixed overnight in 4% PFA, cryoprotected in 30% sucrose and then sectioned coronally at 40  $\mu\text{m}$  thickness, mounted onto slides and coverslipped with Immu-Mount. Images were collected and quantified by an observer “blind” to the experimental conditions to minimize any bias. Universal gains and exposures were established for each label. Raw images of the dLGN were imported to Matlab and an area of interest comprising the dLGN was cropped excluding the ventral lateral geniculate nucleus and the intergeniculate leaflet, then the degree of left and right eye projection overlap was quantified using an established multi-threshold method of analysis [30–32]. This approach allows for a better analysis of overlapping regions independent of the threshold. Values are expressed as the mean  $\pm$  SEM. Significance of differences between means was evaluated by student t-test analysis (Systat).

## Results

### Spatio-Temporal Localization of CB<sub>2</sub>R in the Developing Visual System

Despite emerging evidence supporting the presence of the eCB system in the developing CNS, the expression of CB<sub>2</sub>R is not well characterized in the developing neurovisual system. In order to explore the implication of CB<sub>2</sub>R during retinal axon guidance, we assessed its expression *in vivo*. Western blot analysis of retina lysates revealed that CB<sub>2</sub>R is expressed at early postnatal stages (Figure 1A). CB<sub>2</sub>R levels increased from postnatal day 1 *in vitro* (P1) to P5 while CB<sub>1</sub>R expression remained unchanged (Figure 1A). The specificity of the antibody directed against CB<sub>2</sub>R was tested using retinas obtained from adult *cnr2*<sup>-/-</sup> mice (Figure 1B–C) and P1 hamsters (Figure 1D–I). The spatio-temporal expression of CB<sub>2</sub>R was investigated in the RGC and RGC fiber layers (Figure 1D–O), SC (Figure 2A, B), dLGN (Figure 2C–F), and visual cortex (Figure 2G–J). During early postnatal development, this receptor is expressed in the retina, the dLGN, the SC, and the visual cortex at all ages investigated. Overall, these results demonstrate that CB<sub>2</sub>R is indeed found in the developing neurovisual system.

### The CB<sub>2</sub>R is Expressed in RGCs and their Growth Cones *In Vitro*

Western blot analysis of retinal ganglion cell culture lysates revealed that these neurons express CB<sub>2</sub>R for several DIVs



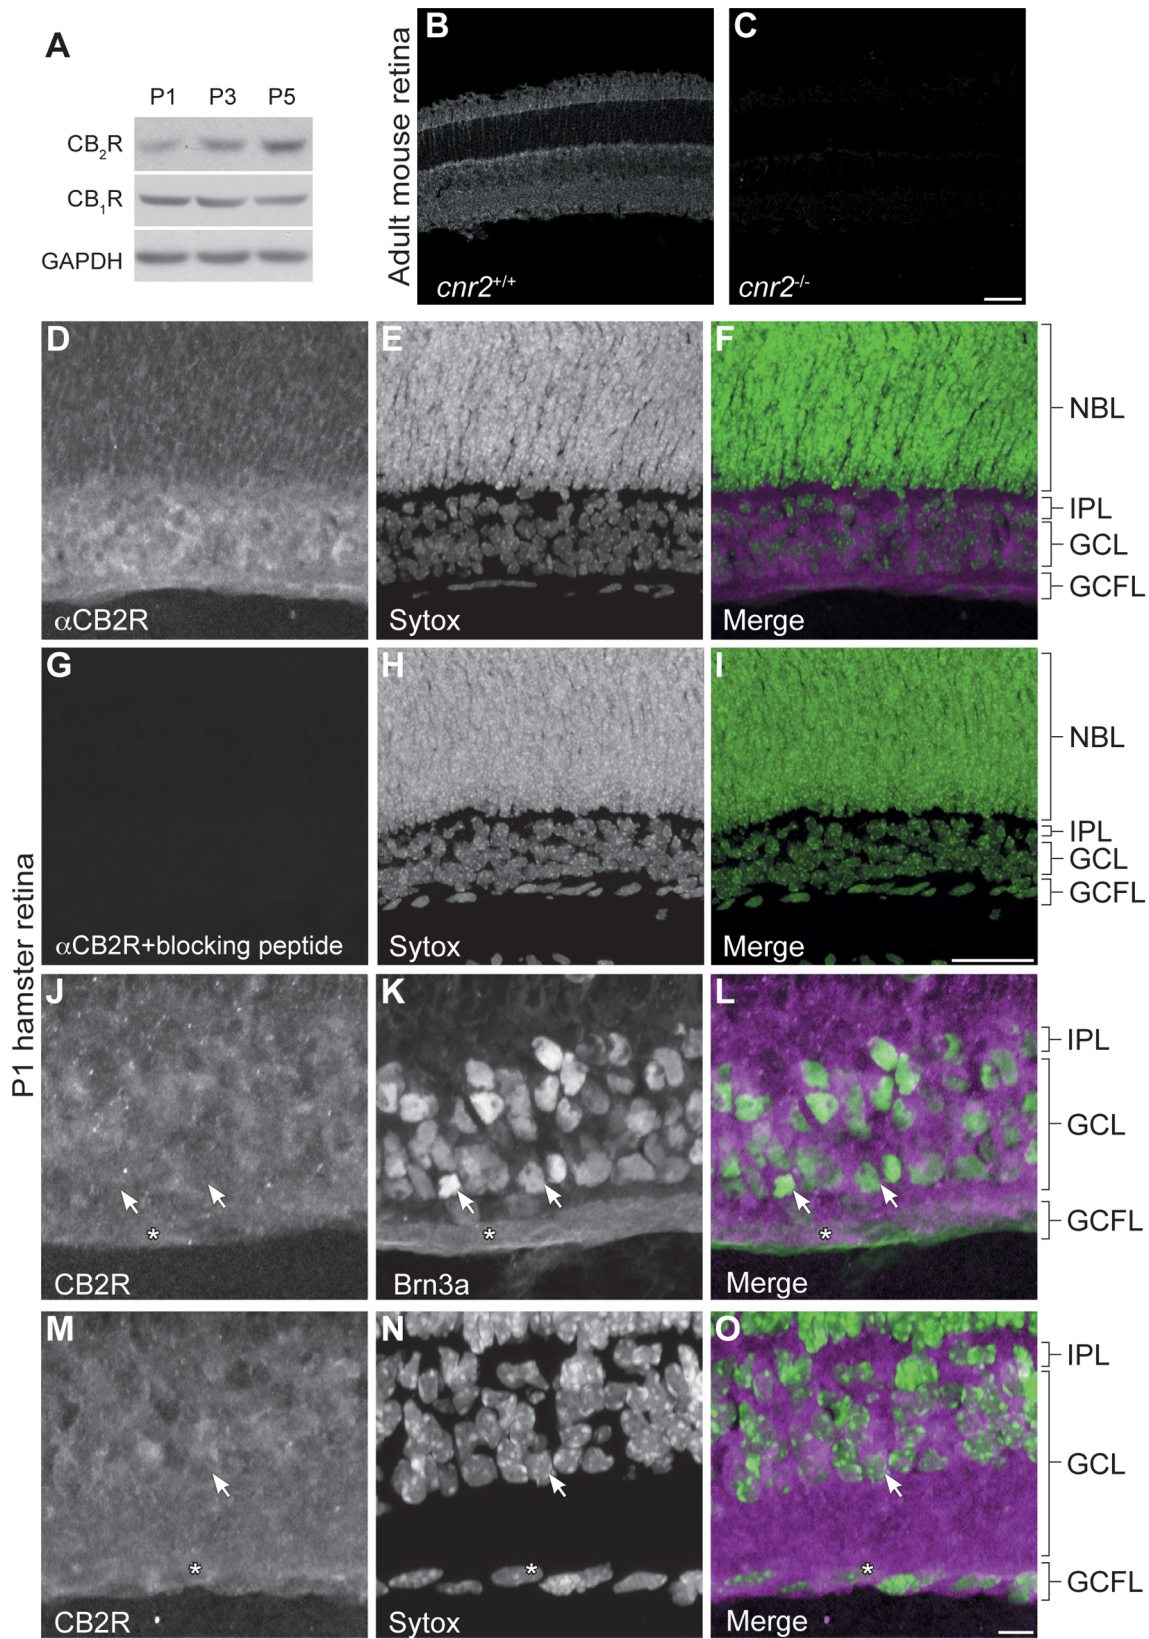

**Figure 1. Spatio-Temporal Expression of the CB<sub>2</sub>R in the Retina during Postnatal Retinal Projection Development *in vivo*.** (A) Western blot analysis of CB<sub>2</sub>R and CB<sub>1</sub>R expression during retinal postnatal development in the hamster. Photomicrographs illustrating the specificity of the CB<sub>2</sub>R antibody in the adult mouse retina (B, C) and the P1 hamster retina (D–I). (D–O), Photomicrographs of hamster retinal cross-sections showing CB<sub>2</sub>R (magenta) during early postnatal development (at postnatal day 1, P1). Sytox (green) was used to stain cell nuclei. Brn3a was used to label retinal ganglion cells (green). In panels (J–O), some CB<sub>2</sub>R positive retinal ganglion cell somas and fibers are indicated using arrows and asterisks

respectively. NBL, Neuroblast layer; IPL, Inner plexiform layer; GCL, Ganglion cell layer; GCFL, Ganglion cell fiber layer. Specificity of the CB<sub>2</sub>R antibody is confirmed using *cnr2*<sup>+/+</sup> and *cnr2*<sup>-/-</sup> adult mouse retina. Scale bars: 50  $\mu$ m (B, C); 25  $\mu$ m (D–I); 10  $\mu$ m (J–O). doi:10.1371/journal.pone.0070849.g001

(Figure 3A). Similar to what we observed *in vivo*, CB<sub>2</sub>R level increased from DIV1 to DIV5 while CB<sub>1</sub>R expression remained unchanged (Figure 3A).

The expression pattern of CB<sub>2</sub>R was assessed by immunocytochemistry in retinal explants obtained from mouse embryos. At DIV1, CB<sub>2</sub>R expression was observed in RGC neurites, growth cones, and filopodia (Figure 3B, E, H). Both CB<sub>2</sub>R and CB<sub>1</sub>R are expressed in the growth cone (Figure 3B–D). The CB<sub>2</sub>R immunoreactivity was also observed in primary cortical neuron cultures at DIV2 (Figure 3T). Western blot analysis of primary neuron culture lysates revealed that these neurons express CB<sub>2</sub>R for several DIVs (Figure 3U).

Diacylglycerol lipase  $\alpha$  (DAGL $\alpha$ ) and N-acyl phosphatidylethanolamine-phospholipase D (NAPE-PLD), enzymes involved in the synthesis of the main eCBs: 2-arachidonylglycerol (2-AG) and arachidonylethanolamine (AEA) respectively, as well as monoacylglycerol lipase (MGL), an enzyme implicated in the degradation of 2-AG, are also expressed in the growth cones, filopodia and neurites of RGCs (Figure 3K–S). These results demonstrate the presence of functional CB<sub>2</sub>R in retinal neurites and growth cones suggesting their implication during growth cone navigation.

### CB<sub>2</sub>R Reorganizes Growth Cone Morphology

The implication of the CB<sub>2</sub>R during axon navigation was evaluated in mouse E14–15 retinal explant and primary neuron growth cones (Figure 4). Because hamsters are born with a premature nervous system, we believe that E14–15 mouse retinal explants are at similar developmental stages than a retina from a newborn hamster.

The growth cone surface area was greatly reduced when CB<sub>2</sub>R agonists (JWH015 or JWH133) were added to the culture; conversely, the surface area was increased following CB<sub>2</sub>R inverse agonist (AM630 or JTE907) stimulation (Figure 4B and E). In addition, the use of agonists caused a decrease in the number of filopodia at the growth cone, while inverse agonists increased their number (Figure 4C and F). These results demonstrate that CB<sub>2</sub>R regulation can directly influence growth cone morphology.

Previous studies have demonstrated the implication of the CB<sub>1</sub>R in GABAergic interneurons and retinal axons axon development [14,15]. Since both receptors are expressed in the developing visual system, it is possible that CB<sub>1</sub>R contributes to the growth cone reorganization induced by JWH015, JWH133, AM630 and JTE907. We addressed this possibility using pharmacological and genetic approaches. Addition of CB<sub>2</sub>R inverse agonists (AM630

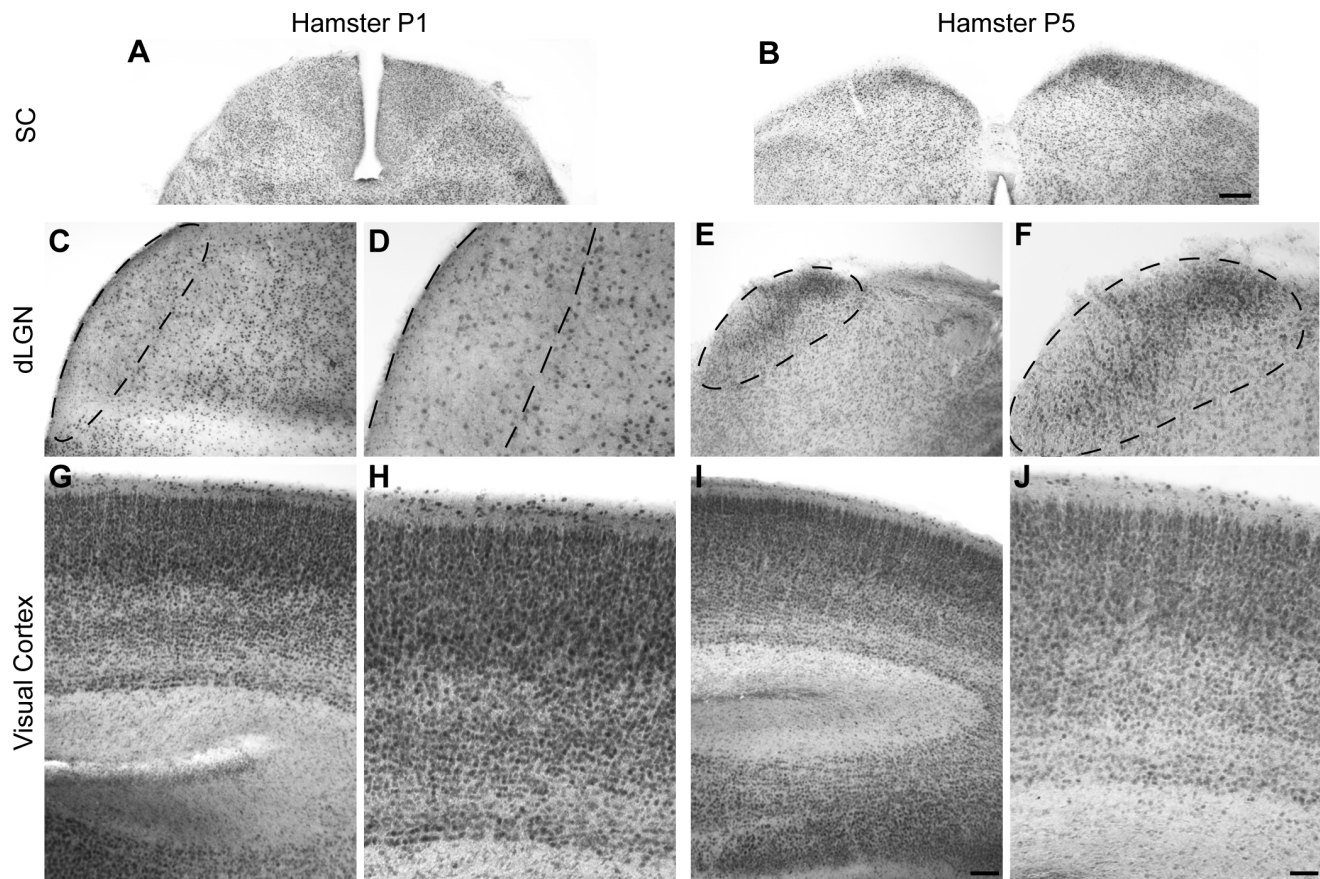

**Figure 2. Expression of CB<sub>2</sub>R in the Superior Colliculus, dorsal Lateral Geniculate Nucleus, and Visual Cortex during Development in the Hamster.** Photomicrographs of coronal sections illustrating CB<sub>2</sub>R expression at P1 (A, C, D, G, H) and P5 (B, E, F, I, J) in the superior colliculus (SC) (A, B), the dorsal lateral geniculate nucleus (dLGN) (C–F), and the visual cortex (G–J). In panel C–F, dLGN has been outlined for better visualization. Scale bars: 200  $\mu$ m (A, B); 100  $\mu$ m (C, E, G, I); 50  $\mu$ m (D, F, H, J). doi:10.1371/journal.pone.0070849.g002



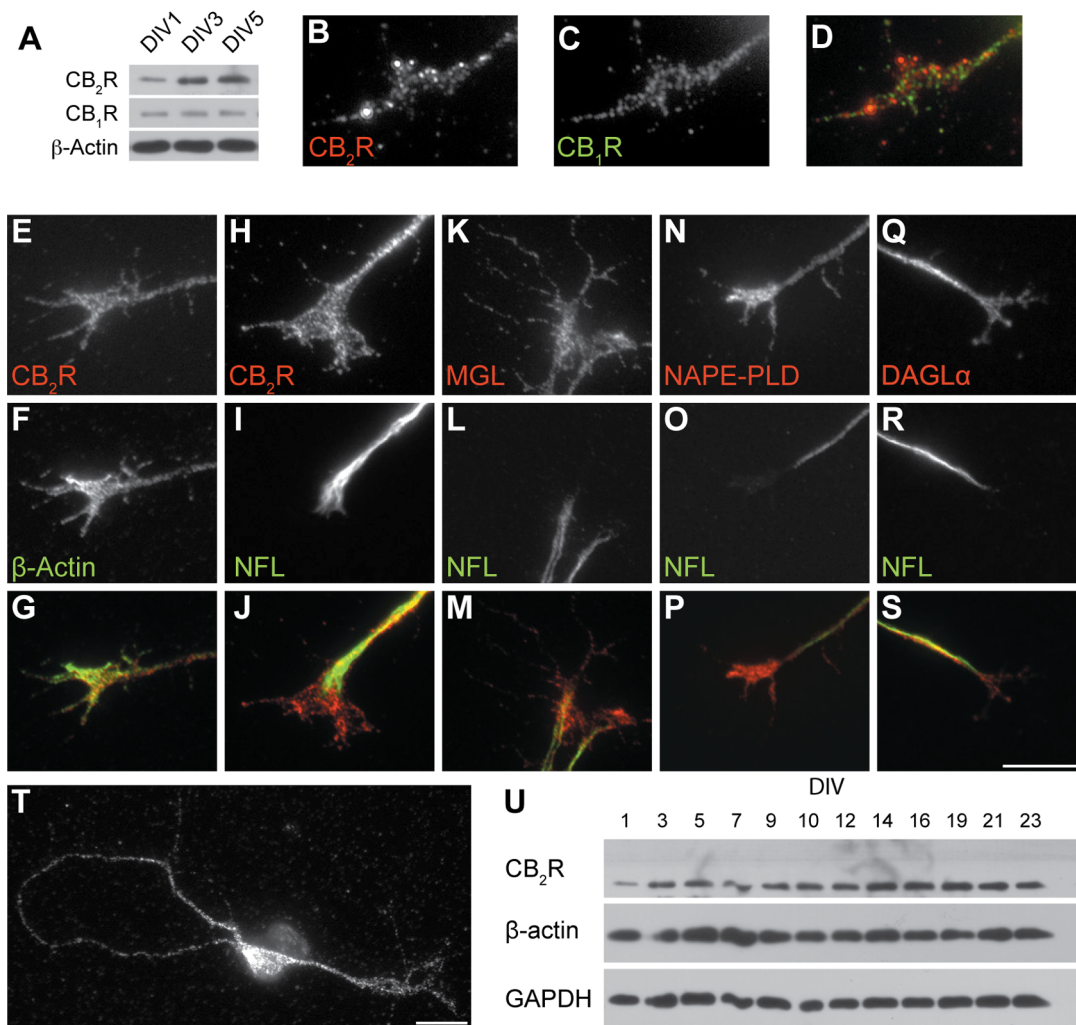

**Figure 3. Expression of CB<sub>2</sub>R, CB<sub>1</sub>R, MGL, NAPE-PLD, and DAGL $\alpha$  *in vitro*.** (A) Western blot shows temporal protein expression of CB<sub>2</sub>R and CB<sub>1</sub>R in cultured retinal ganglion cells. DIV1 retinal explants growth cones labeled with primary antibodies directed against CB<sub>2</sub>R (B, E, and H), CB<sub>1</sub>R (C), MGL (K), NAPE-PLD (N), and DAGL $\alpha$  (Q). Growth cones were also labeled for  $\beta$ -actin (F), Neurofilament-L (I, L, O, and R). Merged images are presented in D, G, J, M, P, and S. (T) Photomicrograph of a DIV2 primary cortical neuron immunolabeled for CB<sub>2</sub>R. Primary neurons were cultured for various numbers of days *in vitro* and cell extracts were equalized for total protein content. (U) Western blot showing temporal protein expression of CB<sub>2</sub>R,  $\beta$ -actin and GAPDH. Scale bars: 5  $\mu$ m (B–S), 15  $\mu$ m (T). doi:10.1371/journal.pone.0070849.g003

and JTE907) to retinal explants obtained from *cnr1*<sup>-/-</sup> embryos produced a significant increase in growth cone area and filopodia number while adding CB<sub>2</sub>R agonists (JWH015 and JWH133) decreased growth cone surface and filopodia number (Figure 5A and B). These changes are comparable to those observed in retinal explants obtained from *cnr1*<sup>+/+</sup> embryos. Addition of these pharmacological agents to retinal explants derived from *cnr2*<sup>+/+</sup> mouse embryos induced similar effects. As predicted, these effects were completely abolished in retinal explants obtained from *cnr2*<sup>-/-</sup> embryos (Figure 5C and D). In another set of experiments, deletion of *cnr2* induced a significant increase in growth cone surface area and in filopodia number compare to wildtype (Figure 5E). These results confirm the contribution of the CB<sub>2</sub>R in the modulation of growth cone behavior. In addition, the effects of AM630, JTE907, JWH015, and JWH133 on the growth cone can be directly attributed to CB<sub>2</sub>R. Noteworthy, ACEA and AM251 (CB<sub>1</sub>R specific ligands) stimulation did not produce any effects on *cnr1*<sup>-/-</sup> growth cones (Figure 5A and B). We observed similar results in primary cortical neurons from these transgenic

animals (unpublished observations). Taken together, these results demonstrate that CB<sub>2</sub>R influences growth cone morphology independently from CB<sub>1</sub>R.

### CB<sub>2</sub>R Modulates RGC Axon Outgrowth

To assess whether CB<sub>2</sub>R could affect axonal growth, E14–15 mouse retinal explants were exposed to CB<sub>2</sub>R agonists or inverse agonists for 15 hours at DIV0 (Figure 6A). Treatment with CB<sub>2</sub>R agonists (JWH015 or JWH133) reduced total projection length of the explants whereas addition of CB<sub>2</sub>R inverse agonists (AM630 or JTE907) increased it (Figure 6B). Retinal fibers emerging from the explants were labeled with L1 antibody to ensure that all the neurites quantified were RGC axons since they are the only neurons that express this protein in the mouse retina [33]. These results demonstrate that CB<sub>2</sub>R influences RGC fiber extension. To ascertain that these effects were CB<sub>2</sub>R specific, we performed the same experiment using *cnr2*<sup>-/-</sup> retinal explants. In contrast to *cnr2*<sup>+/+</sup> cultures, *cnr2*<sup>-/-</sup> retinas did not demonstrate significant changes in projection length following CB<sub>2</sub>R agonist and inverse

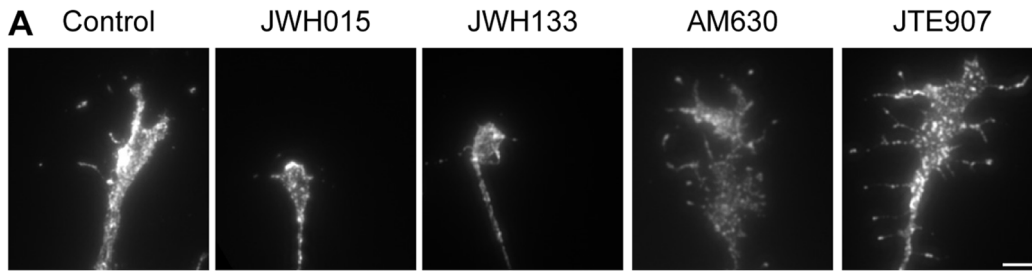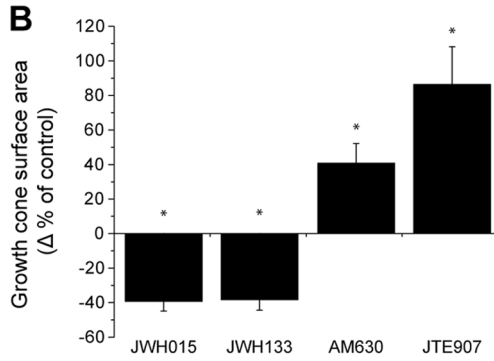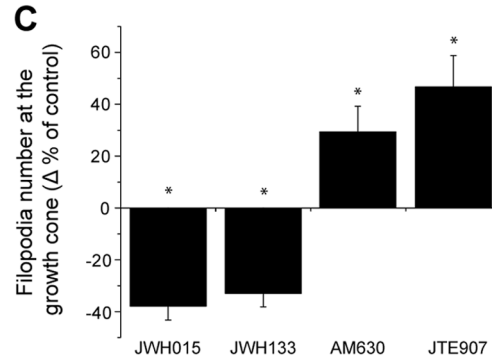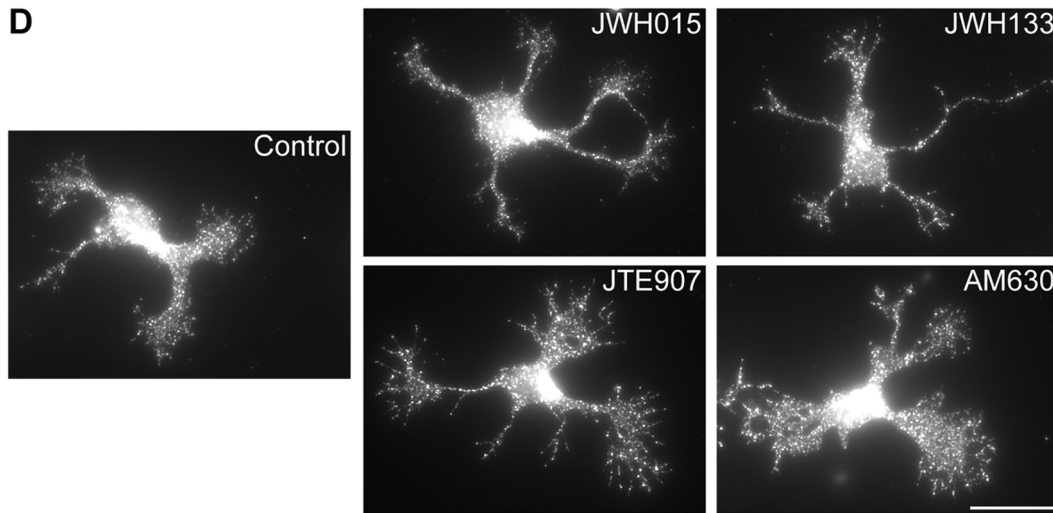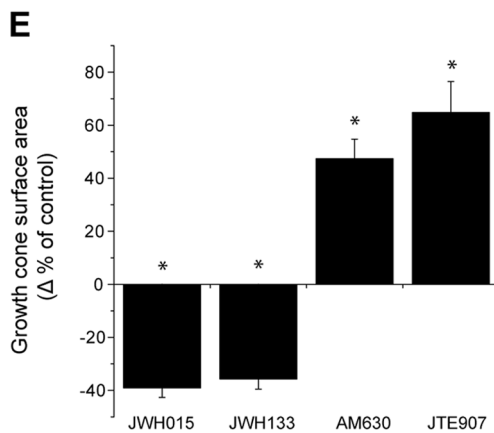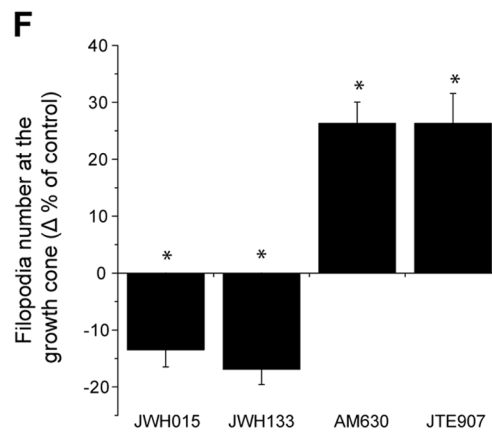

**Figure 4. CB<sub>2</sub>R Reorganizes the Growth Cone Morphology.** (A) Retinal explants and (D) dissociated neurons were grown for 1 and 2 days *in vitro*, respectively. Growth cones were exposed for 1 hour to 300 nM JWH015, 300 nM JWH133, 300 nM AM630, or 300 nM JTE907. Following treatment, retinal explants and neurons were fixed and immunolabeled for L1 and GAP-43, respectively. Addition of CB<sub>2</sub>R inverse agonists (AM630, JTE907) increased growth cone surface area (B and E) and filopodia number (C and F) while the opposite effects was observed following CB<sub>2</sub>R agonists (JWH015 and JWH133) treatment (mean  $\pm$  SEM; n=374 to 714 per condition). Scale bar, 5  $\mu$ m (A); 20  $\mu$ m (D). \*P<0.05 vs control. doi:10.1371/journal.pone.0070849.g004

agonist treatment (Figure 6B). This indicates that these pharmacological agents are selective for the CB<sub>2</sub>R and that this receptor modulates retinal axon growth *in vitro*. Interestingly, we found an increase in axon outgrowth in retinal explants obtained from *cnr2*<sup>-/-</sup> embryos (Figure 6C). This confirms our pharmacological results showing that CB<sub>2</sub>R inhibits axon outgrowth.

#### CB<sub>2</sub>R Agonists Modulate Growth Cone Behaviour

CB<sub>1</sub>R can mediate GABAergic interneurons growth cone repulsion *in vitro* [14]. Recently, we demonstrated that CB<sub>1</sub>R also modulates growth cone turning in glutamatergic neurons (RGCs) [15]. To evaluate whether CB<sub>2</sub>R is involved in retinal axon growth cone steering, turning assay experiments were performed on embryonic mice retinal cultures (Figure 7A). A microgradient

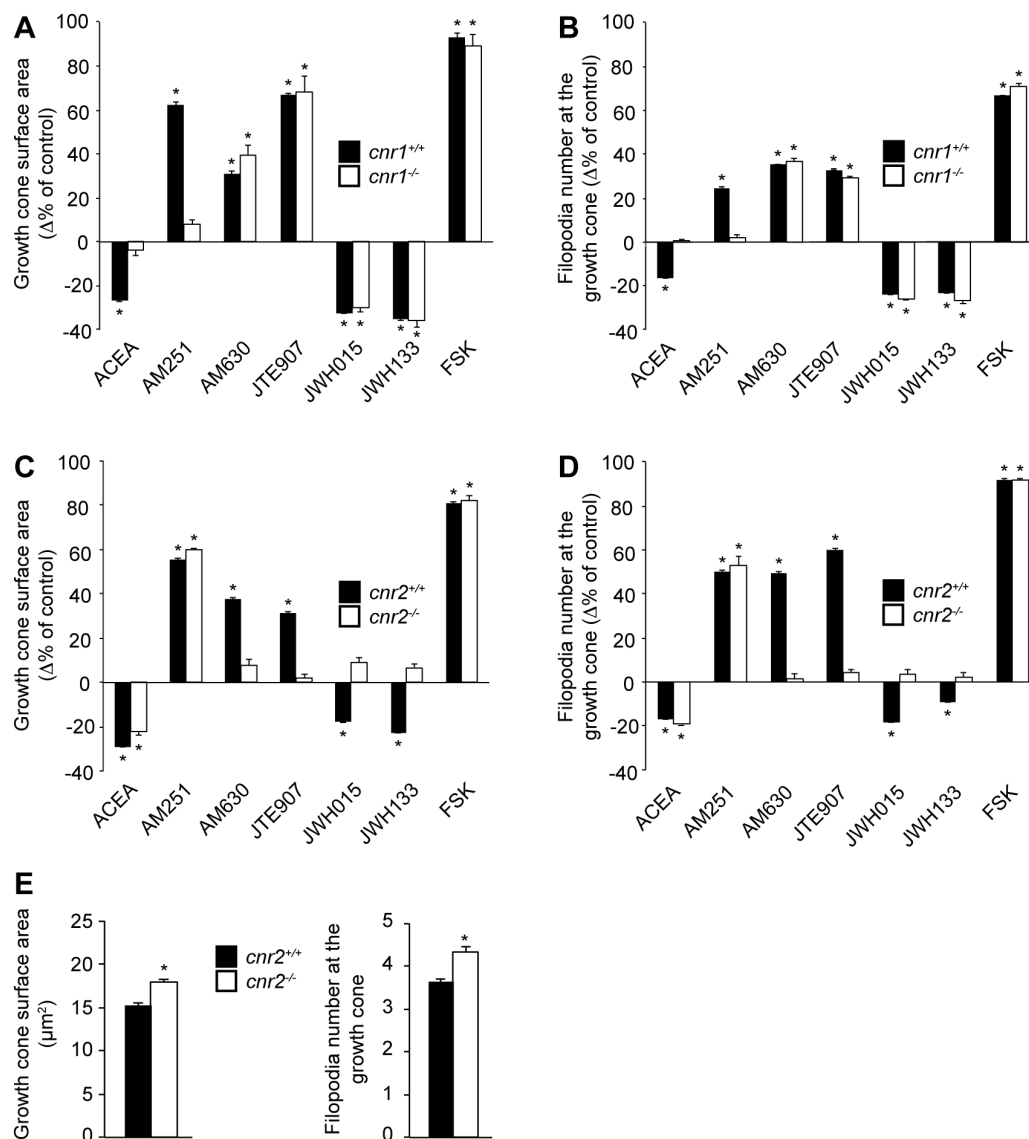

**Figure 5. Confirmation that CB<sub>2</sub>R Modulates Growth Cone Morphology.** Retinal explants obtained from (*cnr1*<sup>+/+</sup> or *cnr1*<sup>-/-</sup>) (A and B) or (*cnr2*<sup>+/+</sup> or *cnr2*<sup>-/-</sup>) (C-E) embryos. In *cnr1*<sup>+/+</sup> or *cnr2*<sup>+/+</sup>, administration of AM251, AM630, JTE907, and FSK increased growth cone surface area (A, C) and filopodia number (B, D) while ACEA, JWH015, and JWH133 decreased them. In *cnr1*<sup>-/-</sup> responses of CB<sub>2</sub>R ligands (ACEA and AM251) were abolished (mean  $\pm$  SEM; (A and B) n=81 to 312 per condition, \*P<0.05 vs control). In *cnr2*<sup>-/-</sup> animals, growth cone surface area (C) and filopodia number (D) were only significantly modified by ACEA, AM251 and FSK while CB<sub>2</sub>R ligand (JWH015, JWH133, AM630, and JTE907) stimulation did not alter these endpoints (mean  $\pm$  SEM; (C and D) n=125 to 264 per condition, \*P<0.05 vs control). (E) Growth cone surface area and filopodia number were increased in *cnr2*<sup>-/-</sup> compared to *cnr2*<sup>+/+</sup>. Mean  $\pm$  SEM; n=120 to 150 per condition, \*P<0.05 vs control. doi:10.1371/journal.pone.0070849.g005

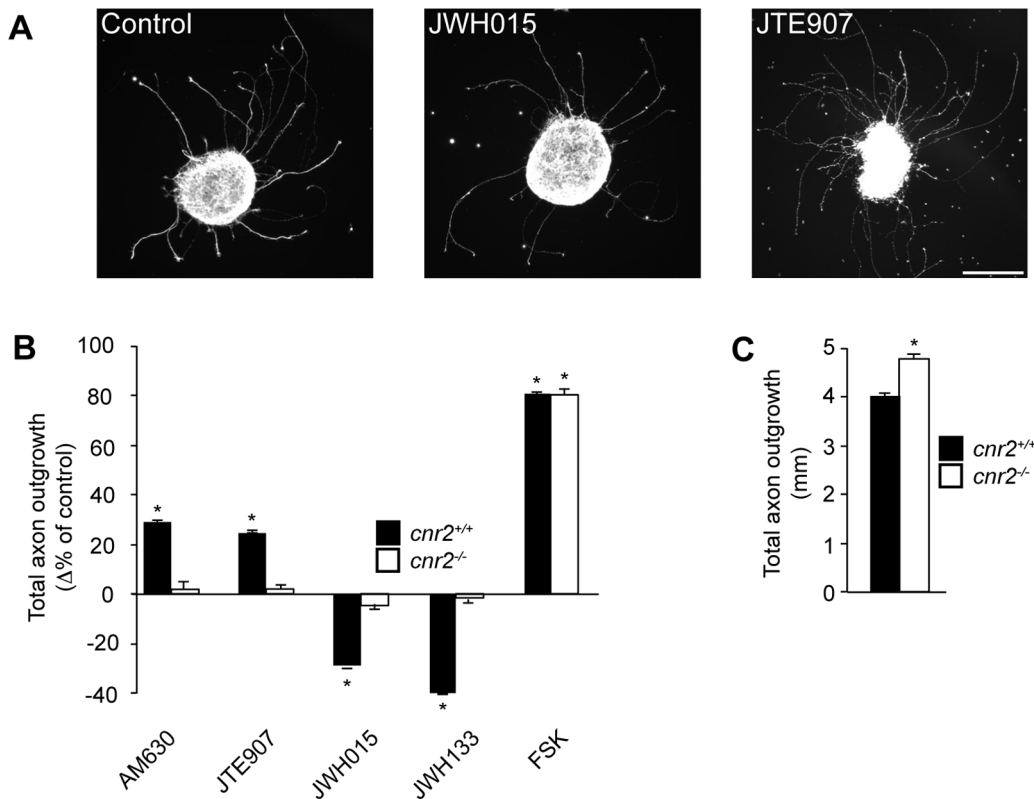

**Figure 6. CB<sub>2</sub>R Modulates Axon Outgrowth.** Retinal explants obtained from C57Bl/6-*cnr2*<sup>+/+</sup> or C57Bl/6-*cnr2*<sup>-/-</sup> mice were treated for 15 hours with 300 nM JWH015, 300 nM JWH133, 300 nM AM630 or 300 nM JTE907. Explants were labeled using anti-L1. (A). Representative explants obtained from *cnr2*<sup>+/+</sup> mice. Scale bar, 200  $\mu$ m. (B) Quantification of total axon outgrowth was normalized for explant area and expressed as percentage of the control group (mean  $\pm$  SEM; n=20 to 129 explants per condition). Addition of CB<sub>2</sub>R agonists (JWH015 and JWH133) to *cnr2*<sup>+/+</sup> retinal explants decreased axon outgrowth, while treatment with CB<sub>2</sub>R inverse agonists (AM630 and JTE907) increased it. Pharmacological modulation of CB<sub>2</sub>R did not induce any significant changes in explant axon outgrowth obtained from *cnr2*<sup>-/-</sup> mouse embryos. \*P<0.05 vs control. (C) Under control conditions, deletion of *cnr2* significantly increased axon outgrowth. \*P<0.05 vs *cnr2*<sup>+/+</sup> (mean  $\pm$  SEM; n=75 to 129 explants per condition). doi:10.1371/journal.pone.0070849.g006

application of JWH015 and JWH133 induced growth cone collapse and neurite retraction while AM630, elicited attractive turning (Figure 7 B–E). The vehicle (EtOH) did not induce any significant changes in growth cone direction. The concentration gradient was visualized with immunofluorescent dextran-FITC (Figure 7F), indicating that the drugs reached the growth cone. These results show that CB<sub>2</sub>R can modify axon growth and steering, and that its agonists can act as chemorepulsive signals on RGC growth cones.

### CB<sub>2</sub>R-Induced Growth Cone Morphological Changes Require PKA Activity

Endocannabinoids and their CB<sub>2</sub>R have a diverse range of signal transduction mechanisms. Since it is well documented that stimulation of CB<sub>2</sub>R and subsequent activation of G<sub>i/o</sub> $\alpha$  inhibits adenylate cyclase (AC) [34], we tested whether CB<sub>2</sub>R modulates the cAMP/PKA pathway during axon growth and guidance. We evaluated changes in growth cone intracellular cAMP levels following CB<sub>2</sub>R modulation using an antibody raised against cAMP (Figure 8A). In *cnr2*<sup>+/+</sup>, the CB<sub>2</sub>R agonists (JWH015 or JWH133) decreased cAMP levels at the growth cone as indicated by the lower fluorescence intensity compared with the control group (Figure 8A–B). Conversely, CB<sub>2</sub>R inverse agonists (AM630 or JTE907) as well as AC activator (forskolin) increased cAMP levels (Figure 8A–B). In *cnr2*<sup>-/-</sup>, CB<sub>2</sub>R agonists and inverse agonists did not produce any significant variation of cAMP levels.

It is noteworthy that, under control conditions, deletion of *cnr2* significantly increases growth cone cAMP level (Figure 8B<sup>1</sup>). In another set of experiments, PKA phosphorylation was significantly lower following CB<sub>2</sub>R agonist stimulation while the opposite was observed following inverse agonist or FSK application as indicated by western blot analysis (Figure 8C). To further assess the implication of the cAMP/PKA pathway, primary neuron cultures were first treated with PKA-selective inhibitors followed by pharmacological manipulation of the CB<sub>2</sub>R. PKA inhibition (KT5720 or H89) blocked AM630-induced increases in growth cone surface area and filopodia number (Figure 8D–F). JWH133 abolished FSK-induced growth cone surface and filopodia increases (Figure 8D–F). These data demonstrate that CB<sub>2</sub>R activation modulates growth cone morphology via the cAMP/PKA pathway.

Upon activation, CB<sub>2</sub>R can also recruit other distinct second-messenger cascades including ERK1/2, PI3K/AKT and mTOR/S6K [35–37]. The implication of these signaling cascades was tested using western blot analysis. Interestingly, in primary neuron cultures, 10 min stimulation of the CB<sub>2</sub>R did not induce changes in AKT, ERK1/2, or S6 phosphorylation levels (Figure 8G). To validate these observations, the experiments were repeated for a 15 min stimulation period without any discernible activation of these pathways (data not shown). Altogether, these results demonstrate that the growth cone morphology reorganization

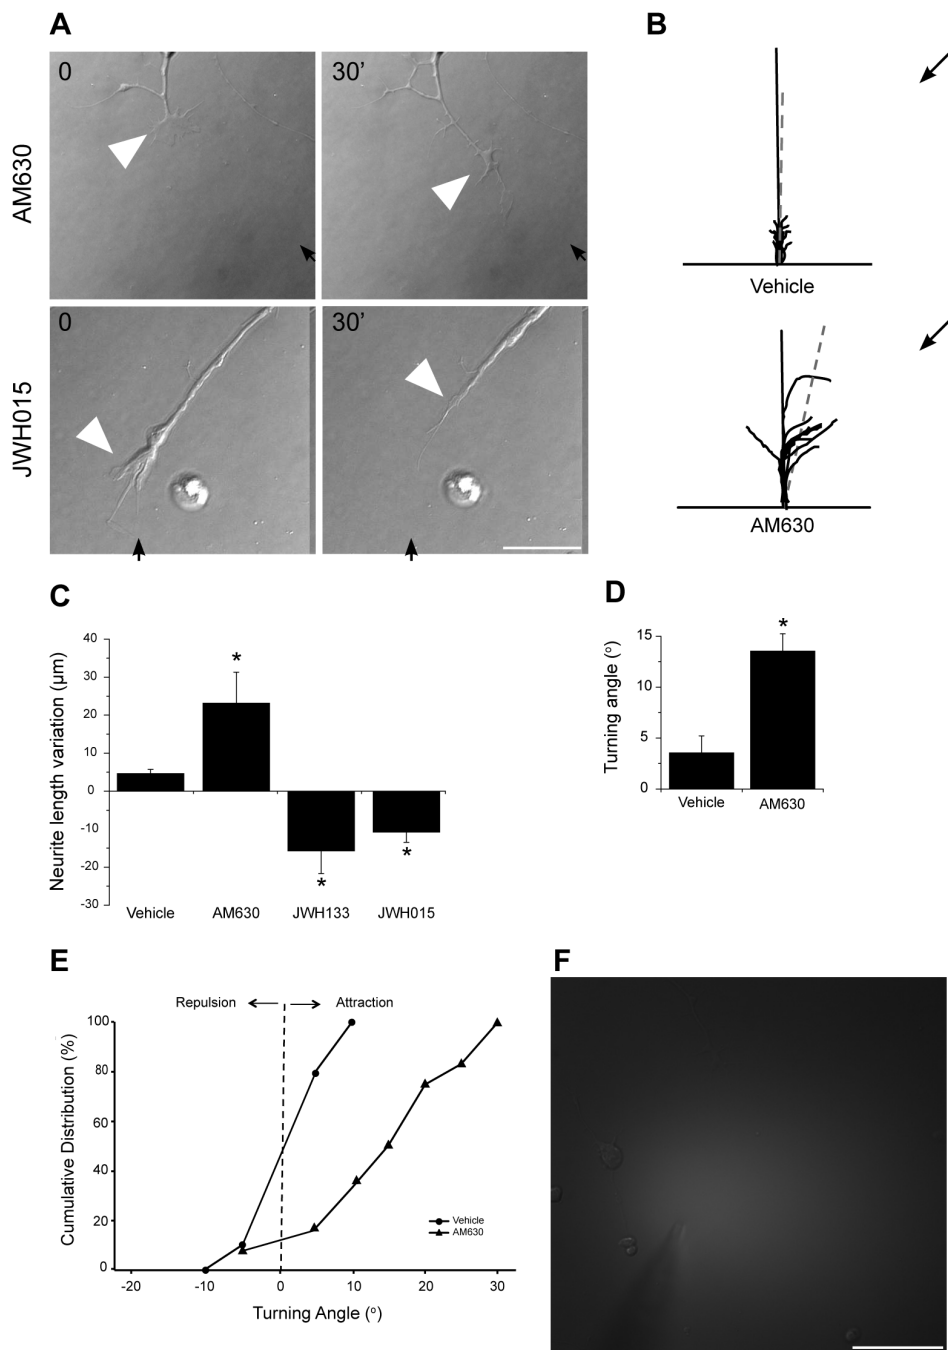

**Figure 7. CB<sub>2</sub>R Agonists Influence Growth Cone Behavior.** (A) Time-lapse microscopy DIV1 mouse retinal explant growth cone exposed to AM630 or JWH015 gradients. Arrows and arrowheads show micropipette angle and growth cone position, respectively. The micropipette tip diameter was 2–3 µm wide and positioned at 45° angle and 100 µm from the growth cone of interest. (B) Superimposed RGC axon trajectories over the 30 min observation period; black arrows indicate the direction of the gradient. Histograms illustrate neurite length (C) and turning angle (D) of growth cone following treatment (mean ± SEM; n = 7 to 13 per condition, \* P < 0.05 vs vehicle). (E) Turning angle cumulative frequency curves of RGC growth cones. The turning angle of each growth cone was plotted against the percentage of growth cones turning that angle or less. CB<sub>2</sub>R inverse agonist (AM630) increased axon growth and turning toward the pipette tip while CB<sub>2</sub>R agonists (JWH133 and JWH015) induced growth cone collapse, axon retraction. (F) Photomicrograph represents a microgradient created during drug application. Scale bars: 20 µm (A); 50 µm (F). doi:10.1371/journal.pone.0070849.g007

induced by CB<sub>2</sub>R is dependent upon the cAMP/PKA pathway and not of ERK1/2, AKT or S6 signaling cascades.

#### Deleted in Colorectal Cancer (DCC) Receptor is Required for CB<sub>2</sub>R Action on Growth Cone

Growth cone cytoskeleton reorganization in response to guidance cues is the main mechanism by which axons navigate toward their target cells [38]. Netrin is a chemotropic factor



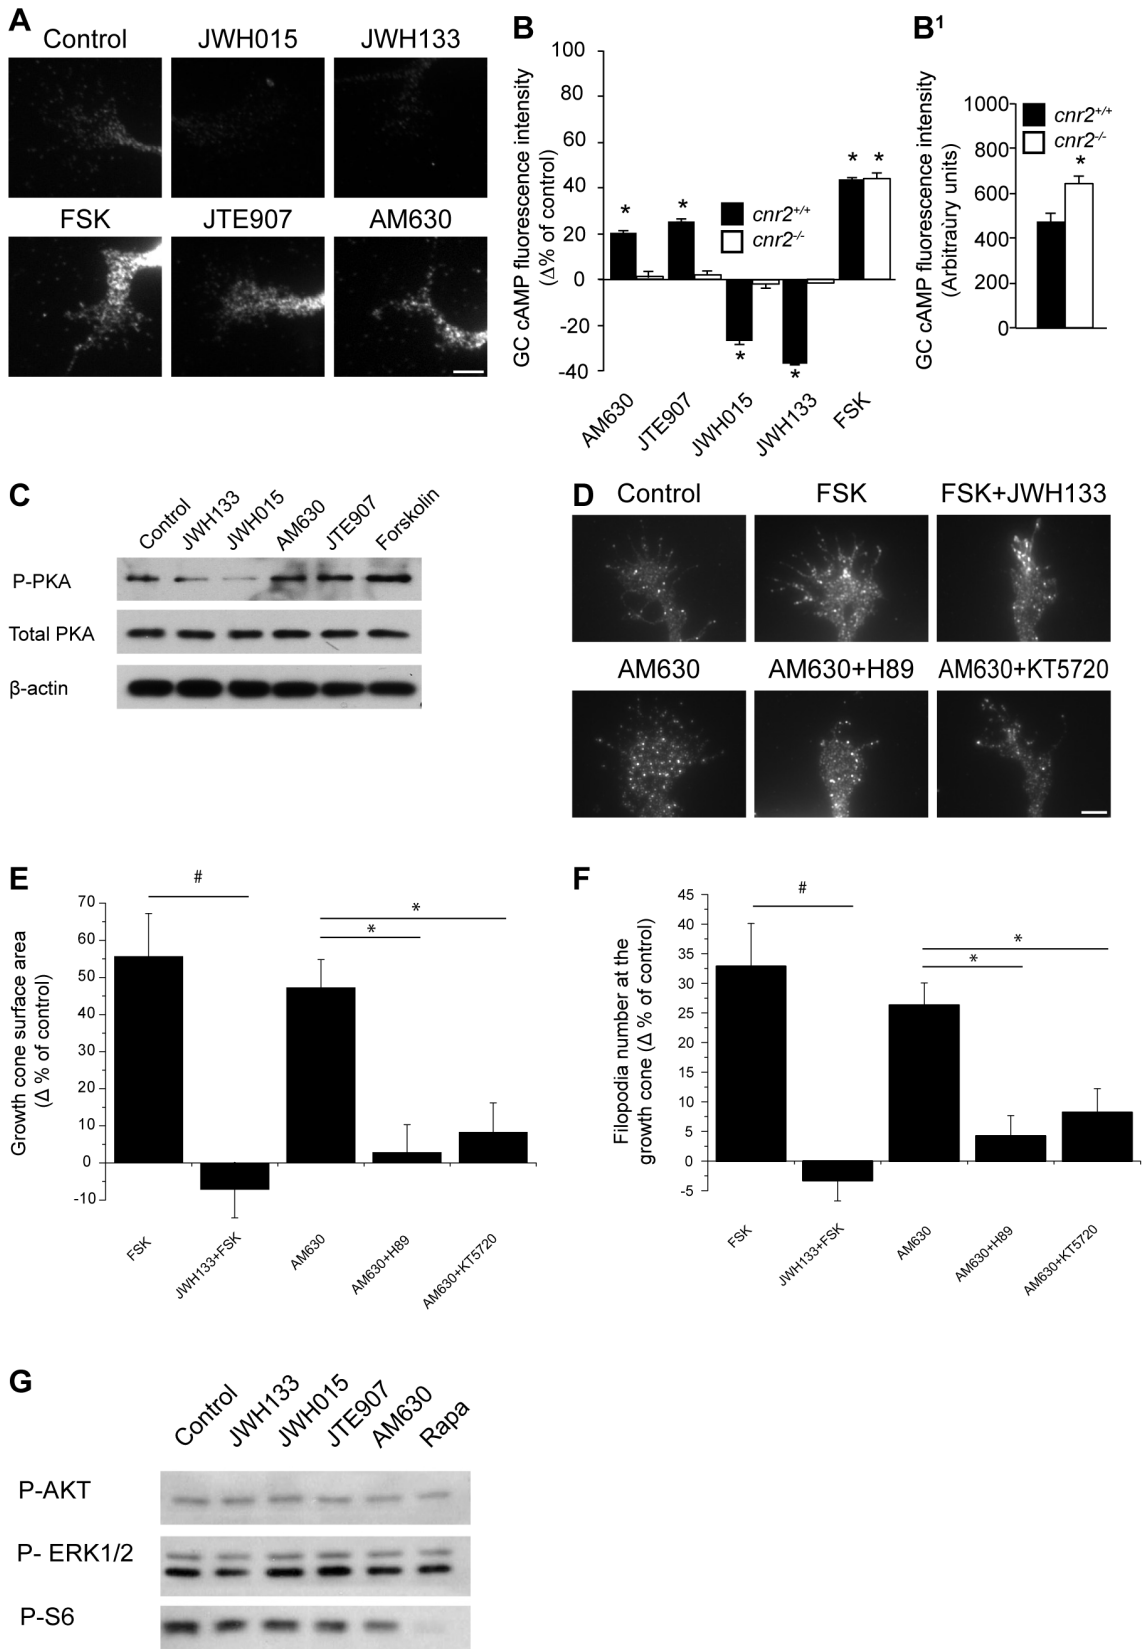

**Figure 8. CB<sub>2</sub>R recruits the cAMP/PKA Pathway as a Downstream Effector.** Growth cones were immunolabeled for intracellular cAMP following FSK, CB<sub>2</sub>R agonist (JWH015, JWH133), or CB<sub>2</sub>R inverse agonist (AM630, JTE907) application. (A) Representative photomicrographs. Scale bar, 5 μm. (B) Quantification of cAMP fluorescence intensity at the *cnr2*<sup>+/+</sup> growth cone indicates a significant decrease in cAMP levels following treatment with JWH133 and JWH015 while the opposite was observed following stimulation with AM630, JTE907 or FSK. No significant variations of cAMP

were observed in growth cones obtained from *cnr2*<sup>-/-</sup> after pharmacological treatments (mean ± SEM; n = 152 to 223 per condition, \*P < 0.05 vs control). (B<sup>1</sup>) Under control conditions, cAMP levels in growth cones of *cnr2*<sup>-/-</sup> embryos were significantly higher than those observed in wildtype embryos (mean ± SEM; n = 152 to 175 per condition, \*P < 0.05 vs control). (C) Western blot analysis indicates important changes in PKA phosphorylation levels following stimulation with CB<sub>2</sub>R agonists or inverse agonists. (D) For growth cone morphology analysis, neurons were exposed for 1 hour to FSK, FSK and JWH133, AM630, AM630 and H89 (a PKA inhibitor), or AM630 and KT5720 (another PKA inhibitor). Scale bar: 5 μm. Neurons were fixed and immunolabeled for GAP-43. Histograms represent quantification of growth cone surface area (E) and filopodia number (F). JWH133 abolished FSK induced increases in growth cone surface area and filopodia number and PKA inhibition abolished growth cone morphology modifications induced by AM630 (mean ± SEM; n = from 160 to 360 per condition, # P < 0.05 vs FSK group \*P < 0.05 vs AM630 group). (G) Effect of the addition of CB<sub>2</sub>R agonists or inverse agonists on phosphorylation levels of AKT, ERK<sup>1/2</sup> and S6 (P-AKT, P-ERK<sup>1/2</sup> and P-S6). doi:10.1371/journal.pone.0070849.g008

implicated in axonal guidance [39] and DCC, a transmembrane immunoglobulin superfamily receptor, is one of its receptors [40]. Growth cone morphology can be modified by DCC activation through substrate adhesion to netrin-1 and the recruitment of actin organization complex [41].

The cAMP/PKA pathway has been suggested to influence the growth cone's sensitivity to netrin-1 [42]. In fact, activation of PKA increases netrin-dependent recruitment of DCC to the plasma membrane [43,44]. Our results suggest that the cAMP/PKA pathway functions as a downstream effector for eCBs during growth cone guidance. Since CB<sub>2</sub>R, DCC, and netrin-1 are expressed in developing neurons (Figure 9A–D), it is reasonable to investigate the potential interactions between these molecules. DCC is widely expressed in RGCs [45] and cortical neurons [44] during development. Recently, we reported its presence in embryonic retinal explant axons, growth cones and filopodia [15]. Furthermore, DCC colocalizes with CB<sub>2</sub>R in these axons (Figure 9A–C). Hence, using pharmacological and genetic approaches, we investigated the potential interaction between these two receptors. First, we examined the effect of perturbing DCC function on CB<sub>2</sub>R evoked growth cone remodeling. Adding a DCC function-blocking antibody (αDCC<sub>nb</sub>) inhibits the CB<sub>2</sub>R inverse agonists AM630 and JTE907 induced-increase in growth cone surface area and filopodia number (Figure 9E–G). Secondly, CB<sub>2</sub>R agonists or inverse agonists did not induce any significant changes in growth cone area and filopodia number in neurons obtained from *dcc*<sup>-/-</sup> mouse embryos (Figure 9H–L). To determine whether CB<sub>2</sub>R activation modulates DCC trafficking to the plasma membrane, neurons were treated with AM630, JTE907, or FSK. Biotinylating cell surface proteins allowed the assessment of plasma membrane DCC. The relative amount of DCC present on the neuronal surface following the treatments was visualized by western blot analysis (Figure 9M). Interestingly, CB<sub>2</sub>R inverse agonists significantly increased the amount of DCC at the plasma membrane (Figure 9M). FSK also augmented the presence of DCC at the neuronal surface. To verify whether the CB<sub>2</sub>R induced DCC trafficking is upstream or downstream of PKA activation, neuronal cultures were treated with KT5720+AM630 or H89+AM630. As visualized by western blot, inhibition of PKA abolished AM630 induced increases in DCC at the plasma membrane (Figure 9M). Taken together, these results demonstrate that the CB<sub>2</sub>R induced reorganization of the growth cone implicates the presence of functional DCC receptors at the cell membrane.

### CB<sub>2</sub>R Modulates Retinal Projection Growth and Segregation *In Vivo*

Previous study on chick embryos have shown that inhibiting CB<sub>1</sub>R affects axonal growth [13]. Recently, we observed that CB<sub>1</sub>R modulates retinal projections *in vivo* [15]. In addition, retinal cAMP elevation was shown to increase retinal collateral length in the lateral terminal nucleus [28].

To assess the contribution of the CB<sub>2</sub>R pathway during the development of retinal projections *in vivo*, hamsters received

intraocular injections of CB<sub>2</sub>R modulators. Compared to rats and mice, hamsters have shorter gestation period. Consequently, they are born with a relatively premature nervous system [24]. To take advantage of this opportunity, 24h after birth (P1), hamsters received a unilateral intraocular injection of AM630 or JWH133. Our data show that collateral projection length at the lateral terminal nucleus was significantly higher in the group treated with a CB<sub>2</sub>R inverse agonist when compared with the untreated group (Figure 10A–C). JWH133 did not affect significantly projection growth. Axon collateral density was also evaluated and branch density was significantly increased in the AM630-treated group (Figure 10D). In addition, interfering with the intrinsic ocular cannabinoid signaling with AM630 induced aberrant projections in the ipsilateral side of the SC as indicated by a robust labeling of retinal axons (Figure 10E).

During perinatal development, RGCs from both eyes send axons, which connect with multiple target cells in the dorsal lateral geniculate nucleus. These projections spread throughout the dLGN sharing common terminal space. During postnatal development, an eye-specific segregation occurs [46]. In the adult rodent, RGC axons occupy distinct eye-dependent non-overlapping regions of the dLGN. The implication of the CB<sub>2</sub>R during retinogeniculate development was further investigated in the dLGN in adult CB<sub>2</sub>R-deficient mice (*cnr2*<sup>-/-</sup>) and their wild-type (*cnr2*<sup>+/+</sup>) littermates. Adult *cnr2*<sup>+/+</sup> and *cnr2*<sup>-/-</sup> mice received a bilateral intra-ocular injection of the anterograde tracers CTb-Alexa488 in the left and of CTb-Alexa546 in the right eyes, respectively. Our data indicate a significant increase of the overlapping region between contralateral and ipsilateral RGC projections in the dLGN of *cnr2*<sup>-/-</sup> mice (Figure 10F–G). These observations confirm the essential role played by the CB<sub>2</sub>R during retinogeniculate development.

### Discussion

In the present study, we showed that CB<sub>2</sub>R is present throughout the visual pathway during development including *in vitro* primary RGC and retinal explants. CB<sub>2</sub>R activation modulates cAMP levels resulting in a PKA-dependent modification of the growth cone surface area and filopodia number. In addition, we observed that retinal axon outgrowth decreased following CB<sub>2</sub>R agonist treatment while stimulation with inverse agonist increased it. Most importantly, DCC, an axon guidance molecule receptor, is required for CB<sub>2</sub>R mediated morphological changes of the growth cone. *In vivo*, CB<sub>2</sub>R modulated RGC projection length, induced aberrant projections and the absence of this receptor altered eye-specific segregation. Taken together, these observations demonstrate that CB<sub>2</sub>R plays an essential role in the development of the retinohalamic pathway.

The expression of CB<sub>2</sub>R in the adult mammal brain has been previously detected by immunoreactivity [7,8]. Although this receptor was also localized in developing neural progenitors and dorsal root ganglia [5,6], its expression in retinal projections and along the visual tract remained unknown until now. Here, we

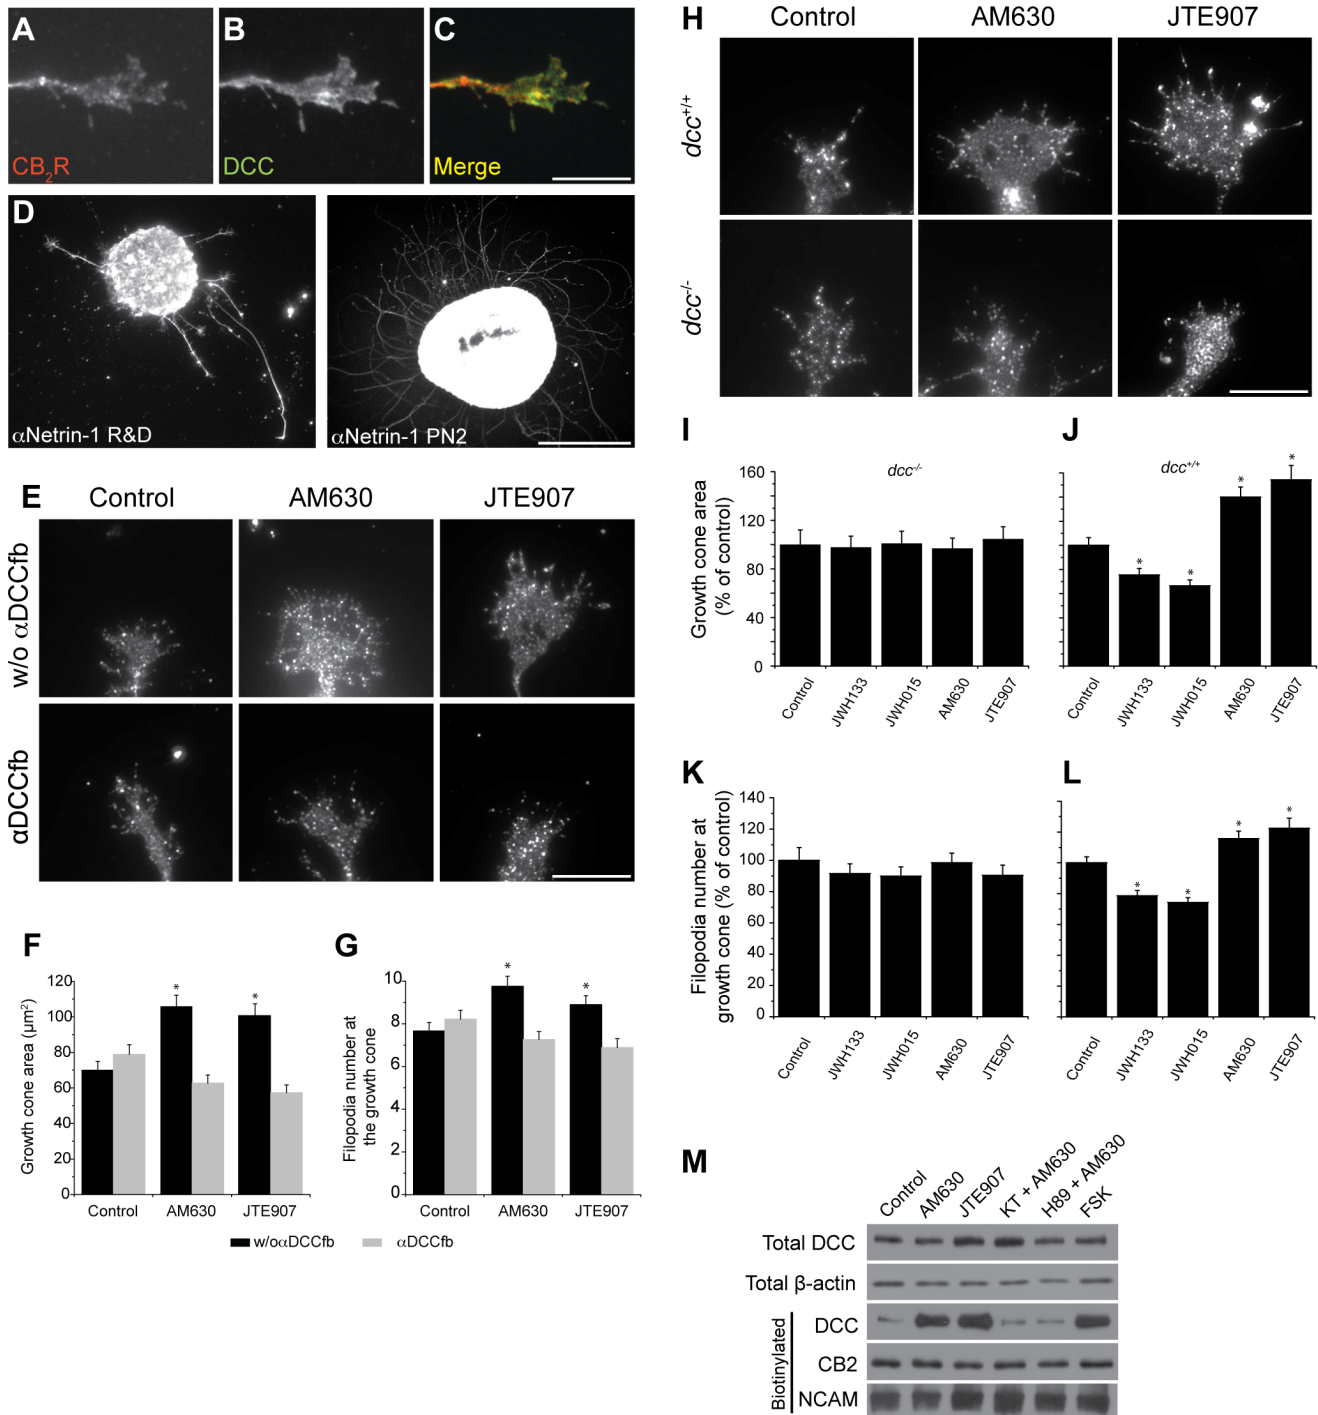

**Figure 9. DCC Receptor is Required Downstream of PKA for CB<sub>2</sub>R Induced Reorganization of the growth cone.** Retinal explants were grown for 1 DIV and growth cones were immunolabeled for CB<sub>2</sub>R (A) and DCC receptor (B). Merged image is presented in C. They were also immunostained for netrin-1, a ligand of DCC receptor (D). Dissociated neurons were cultured for 2 days *in vitro* and treated with pharmacological agents for 1 hour. (E) DCC function blocking (αDCC<sub>fb</sub>) antibody 3.5 μg/ml was added 15 minutes prior to AM630 or JTE907 stimulation. αDCC<sub>fb</sub> abolished AM630 and JTE907 induced increases in growth cone surface area (F) and filopodia number (G) (mean ± SEM; n = from 134 to 159 per conditions, \*P < 0.05 vs control condition). (H) Photomicrographs of growth cone for *dcc*<sup>+/+</sup> or *dcc*<sup>-/-</sup> mice. Histograms showing the size of growth cone area and the filopodia numbers in *dcc*<sup>+/+</sup> and *dcc*<sup>-/-</sup> animals (I–L). Pharmacological modulation of the CB<sub>2</sub>R did not induce any significant changes in growth cone surface area nor filopodia number in primary neuron cultures obtained from *dcc*<sup>-/-</sup> mice embryos (I and K) whereas JWH133 and JWH1015 induced a decrease in growth cone surface and filopodia number while AM630 and JTE907 augmented these endpoints in *dcc*<sup>+/+</sup> neuron cultures (J and L) (mean ± SEM; 125 to 219 per conditions, \*P < 0.05 vs control condition). (M) DIV2 neurons were treated with AM630, JTE907, AM630 and KT5720, AM630 and H89, or FSK for 15 minutes. Following biotinylation and western blot, expression of surface protein was assessed for DCC receptor, CB<sub>2</sub>R and NCAM. Scale bar: 10 μm (A–C, E, H); 250 μm (D). doi:10.1371/journal.pone.0070849.g009

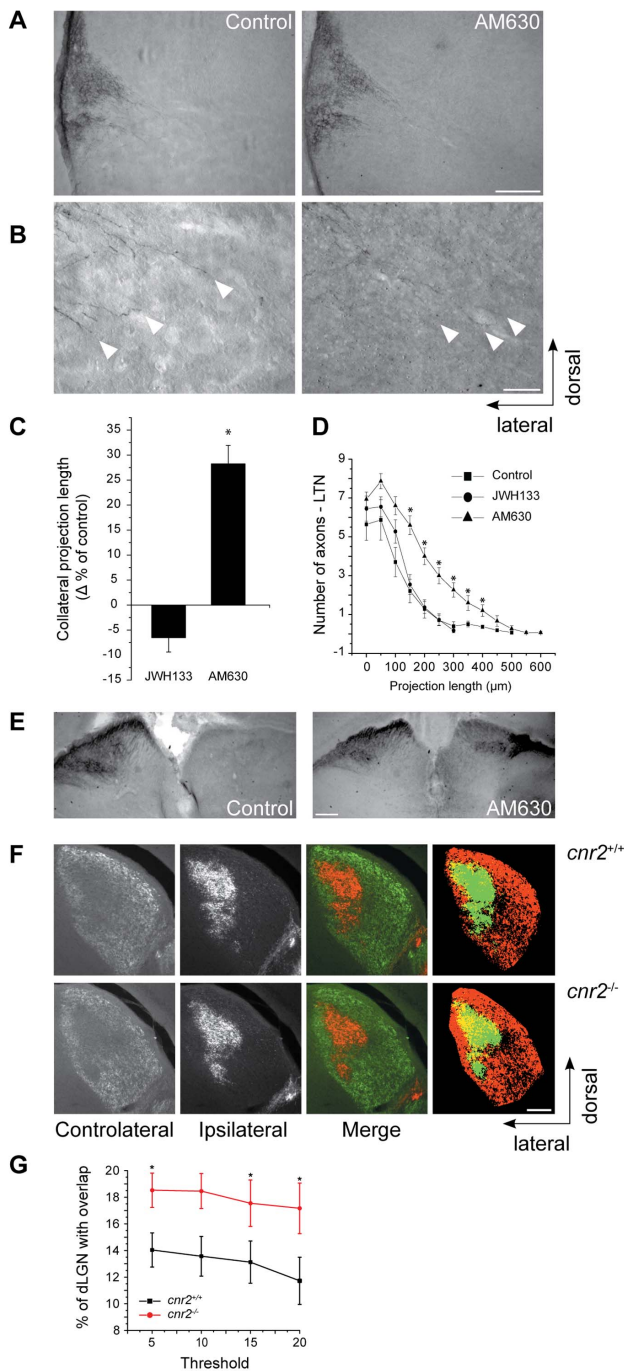

**Figure 10. CB<sub>2</sub>R Modulates RGC Projection Development *In Vivo* and Eye-Specific Segregation in the Lateral Geniculate Nucleus.** Hamsters at P1 were injected in the eye with CTb-FITC and 300  $\mu$ M AM630, 300  $\mu$ M JWH133 or vehicle control. Perfusion and brain fixation were done at P5. CTb revelation was performed with anti-CTb, enhanced with ABC Kit and revealed with DAB-Nickel kit. Photomicrographs of the lateral terminal nucleus (LTN) for the control and the AM630 groups (A) and terminal magnifications are shown (B). Quantification for collateral projection length is expressed as mean  $\pm$  SEM percentage versus the control group (C). Quantification for axon branch density was also performed. AM630 increased axon growth (C) and collateral branch number (D) ( $n=4$  to 5 brains per condition,  $*P<0.05$  versus control group). (E) Photomicrographs showing SC for the control and the treated groups. In the AM630 treated group, the presence of aberrant projections is illustrated by labeling in both hemispheres. (F) Fluorescence images of the dLGN for *cnr2*<sup>+/+</sup> and *cnr2*<sup>-/-</sup> genotypes. (G) Quantification for overlapping inputs in the dLGN.

*cnr2*<sup>-/-</sup> mice showing contralateral projections from right eye injected with CTb-Alexa-546 and ipsilateral projections from left eye injected with CTb-Alexa-488. Merged images show all projections from both eyes to the dorsal lateral geniculate nucleus, overlaying projections are shown in yellow (F). (G) Graphic shows percentage of the dorsal lateral geniculate nucleus (dLGN) receiving overlapping inputs as mean  $\pm$  SEM ( $n=4$  to 5 brains per condition,  $*P<0.05$  versus control group). Quantification of the percentage of overlapping inputs in *cnr2*<sup>-/-</sup> and *cnr2*<sup>+/+</sup> adult mice indicating a significant increase in overlap between contralateral and ipsilateral RGC projections in the dLGN of *cnr2*<sup>-/-</sup> mice. Scale bars, 200  $\mu$ m (A, F); 50  $\mu$ m (B); 600  $\mu$ m (E). doi:10.1371/journal.pone.0070849.g010

show that RGC axons express CB<sub>2</sub>R and eCBs synthesis enzymes NAPE-PLD and DAGL $\alpha$  as well as degradation enzyme MGL. The receptor is present on axonal projections, growth cones and their filopodia *in vitro*. Moreover, *in vivo*, CB<sub>2</sub>R is localized at several important decision making points along the visual pathway. Indeed, CB<sub>2</sub>R is expressed in a spatio-temporal fashion in RGCs, optical chiasm, dLGN and SC. These results combined with those reported by Argaw et al (2011) clearly demonstrate the presence of the eCB system in the developing neurovisual pathway and strongly suggest its influence on axonal navigation during CNS development.

In this study, CB<sub>2</sub>R effects on growth cone morphology were demonstrated in retinal axons and primary neuron cultures. Both bath application and microgradient stimulation studies showed its action on the growth cone. CB<sub>2</sub>R agonists produced chemorepulsive effect and collapse of the axonal growth cone. Additionally, CB<sub>2</sub>R had an important effect on retinal axon length for both short and long stimulation periods showing its capacity to influence axonal growth rate. These results are similar to those recently observed by our group for CB<sub>1</sub>R [15] and by other laboratories [13,14,47].

To characterize the mechanism by which CB<sub>2</sub>R modulates growth cone morphology and axonal growth, we examined an AC dependent signaling pathway [48]. Our study shows that CB<sub>2</sub>R acts by modulating intracellular cAMP concentrations, which directly influence PKA activity. These results are similar to those obtained with CB<sub>1</sub>R [15] but are in contradiction with a study showing that stimulation of CB<sub>1</sub>R with anandamide induced MAPK activation in GABAergic neurons [14]. However, under our experimental conditions, the MAPK signaling pathway was not modulated by CB<sub>2</sub>R. This could be explained in part by the fact that Berghuis et al. (2007) have studied the CB<sub>1</sub>R whereas we studied CB<sub>2</sub>R. Also, the difference in neuron types (GABAergic vs glutamatergic) could also account for the divergence in the downstream signaling pathways. We studied embryonic RGC growth cones that are glutamatergic in nature as compared to GABAergic interneurons favored by the Berghuis *et al.* (2007) study. Elevated cAMP levels in growth cone increase surface area and filopodia number in RGCs [28]. Adding CB<sub>2</sub>R inverse agonists to the neurons produced the same effect and increased growth cone cAMP levels. Furthermore, we showed that the CB<sub>2</sub>R modulates the cAMP/PKA pathway and that this signaling pathway is essential to the growth cone remodeling. This places PKA as an important downstream determinant for CB<sub>2</sub>R-induced growth cone reorganization.

PKA is not the only important molecule since DCC is also required for CB<sub>2</sub>R-induced growth cone morphology alterations. In the presence of an antibody that blocks DCC function, CB<sub>2</sub>R agonists or inverse agonists induced no changes in growth cone morphology. Furthermore, in *dcc* knockout mice, the absence of a functional DCC blocked the effects of CB<sub>2</sub>R on the growth cone. Earlier reports showed that PKA potentiated the mobilization of DCC to the cell surface [43,44]. We have confirmed that elevation

of PKA activity induces DCC receptor translocation to the plasma membrane through biotinylation analysis. Our results indicate that CB<sub>2</sub>R, which modulates cAMP levels, regulates growth cone expansion via a PKA-dependant mechanism. Variation of PKA activity will modulate the presence of DCC receptors at the growth cone surface and will induce growth cone morphological changes [43,44]. A similar mechanism was observed with CB<sub>1</sub>R [15].

Recently, it was proposed that CB<sub>1</sub>R stimulation activates RhoA in GABAergic interneurons [14]. Spatially restricted activation of RhoA in the collapsing growth cone is associated with filopodia retraction and growth cone repulsion in response to chemical and electrical cues [49–51] through the activation of the serine-threonine kinase Rho kinase (ROCK) [51]. Moore et al. [52] demonstrated that RhoA inhibition recruits DCC to the plasma membrane. Therefore, CB<sub>2</sub>R agonists may, by increasing RhoA activity, prevent the presence of DCC at the membrane and consequently induce growth cone collapse. Conversely, CB<sub>2</sub>R inverse agonists or antagonists could decrease the activity of RhoA and promote axon growth via the translocation of DCC to the plasma membrane. Evidences from the literature suggest that there is an interaction between the RhoA and PKA pathways. In fact, PKA can directly inhibit RhoA [53–55], thus the PKA induced recruitment of DCC to the plasma membrane could result from several mechanisms and the inhibition of RhoA signaling might be one of them. We are currently investigating this possibility.

It is known that CB<sub>1</sub>R agonists induce neurite retraction in neuroblast cells [56] and chemorepulsive effect in GABAergic [14] and glutamatergic neurons [15]. Since CB<sub>2</sub>R can modulate growth cone morphology and its agonists have a repulsive effect on RGC axons, eCBs could act as an inhibitory signal in axon guidance. During brain development where axons travel relatively long distances to connect to specific neurons, CB<sub>2</sub>R could represent another mechanism by which eCBs modulate the guidance response to netrin-1 [42] or other guidance cues. In fact, integration of multiple cues by RGC axons may increase the specificity of their navigation and allow a better target recognition.

We showed that a single intraocular injection of AM630, a CB<sub>2</sub>R inverse agonist, increased the length of projections in the lateral terminal nucleus. Similar effects on growth rate were reported using cAMP analog [28]. We also observed the presence of aberrant ipsilateral RGC projections following a single

intraocular injection of AM630. One may argue that the injection increased the branching or stabilized ipsilateral projections that would have normally retracted.

We noticed that adult *cmr2*<sup>-/-</sup> mice have increased overlapping regions of retinal projections from the two eyes in the dLGN compared to *cmr2*<sup>+/+</sup> mice. We interpreted this as a deficit in eye-specific segregation of retinal projections. In wildtype animals, this process could be influenced by eCB activity at the retina and/or directly at the axon terminal. It is possible that non functional CB<sub>2</sub>Rs influence retinal spontaneous activity, which is necessary for segregation and maintenance of specific inputs to the dLGN [57], thus modifying the segregation outcome. Deficiency in eye-specific segregation might also occur as a result of the absence of functional CB<sub>2</sub>R directly at the dLGN. In *cmr2*<sup>-/-</sup> mouse, eCBs would not be able to act as local modulators, inducing retraction of exuberant ectopic branches that have less activity. In fact, eCBs, via their action on CB<sub>2</sub>Rs may contribute to the normal inhibitory environment present in the CNS [58]. It is also reasonable to assume that *cmr2* knockout effect may not be as important as predicted because CB<sub>1</sub>R might in part surrogate CB<sub>2</sub>R activity, especially since main constituents of the eCBs, like 2-AG, have affinity for both receptors types [59,60].

In conclusion, this study demonstrates for the first time that CB<sub>2</sub>R is involved in axon guidance, and identifies the signaling pathway that mediates its effects. Therefore, we suggest a mechanism by which CB<sub>2</sub>R modulates retinorecipient development and nervous system wiring.

## Acknowledgments

We thank Robert Weinberg for the *dec* transgenic mice and Beat Lutz for the *cmr1* knockout mice. We thank Matthieu Vanni for the image analysis script programmed with MatLab software and Florence Dotigny, Marc Dufresne, Sophie Charron and Denis Latendresse for their excellent technical assistance.

## Author Contributions

Conceived and designed the experiments: GD AA BC MP CC JFB. Performed the experiments: GD AA BC HC NT NZ JFB. Analyzed the data: GD AA BC HC NT NZ JFB. Wrote the paper: GD AA BC HC CC MP JFB.

## References

- Salzet M (2000) Invertebrate molecular neuroimmune processes. *Brain Res Brain Res Rev* 34: 69–79.
- Howlett AC, Barth F, Bonner TI, Cabral G, Casellas P, et al. (2002) International Union of Pharmacology. XXVII. Classification of cannabinoid receptors. *Pharmacol Rev* 54: 161–202.
- Klein TW, Newton C, Larsen K, Lu L, Perkins I, et al. (2003) The cannabinoid system and immune modulation. *J Leukoc Biol* 74: 486–496.
- Skaper SD, Buriani A, Dal Toso R, Petrelli L, Romanello S, et al. (1996) The ALLAmide palmitoylethanolamide and cannabinoids, but not anandamide, are protective in a delayed postglutamate paradigm of excitotoxic death in cerebellar granule neurons. *Proc Natl Acad Sci U S A* 93: 3984–3989.
- Ross RA, Coutts AA, McFarlane SM, Anavi-Goffer S, Irving AJ, et al. (2001) Actions of cannabinoid receptor ligands on rat cultured sensory neurones: implications for antinociception. *Neuropharmacology* 40: 221–232.
- Palazuelos J, Aguado T, Egia A, Mechoulam R, Guzman M, et al. (2006) Non-psychoactive CB<sub>2</sub> cannabinoid agonists stimulate neural progenitor proliferation. *Faseb J* 20: 2405–2407.
- Van Sickle MD, Duncan M, Kingsley PJ, Mouihate A, Urbani P, et al. (2005) Identification and functional characterization of brainstem cannabinoid CB<sub>2</sub> receptors. *Science* 310: 329–332.
- Gong JP, Onaivi ES, Ishiguro H, Liu QR, Tagliaferro PA, et al. (2006) Cannabinoid CB<sub>2</sub> receptors: immunohistochemical localization in rat brain. *Brain Res* 1071: 10–23.
- Lopez EM, Tagliaferro P, Onaivi ES, Lopez-Costa JJ (2011) Distribution of CB<sub>2</sub> cannabinoid receptor in adult rat retina. *Synapse* 65: 388–392.
- Lu Q, Straiker A, Maguire G (2000) Expression of CB<sub>2</sub> cannabinoid receptor mRNA in adult rat retina. *Vis Neurosci* 17: 91–95.
- Fernandez-Ruiz J, Berrendero F, Hernandez ML, Ramos JA (2000) The endogenous cannabinoid system and brain development. *Trends Neurosci* 23: 14–20.
- Mulder J, Aguado T, Keimpema E, Barabas K, Ballester Rosado CJ, et al. (2008) Endocannabinoid signaling controls pyramidal cell specification and long-range axon patterning. *Proc Natl Acad Sci U S A* 105: 8760–8765.
- Watson S, Chambers D, Hobbs C, Doherty P, Graham A (2008) The endocannabinoid receptor, CB<sub>1</sub>, is required for normal axonal growth and fasciculation. *Molecular and Cellular Neuroscience* 38: 89–97.
- Berghuis P, Rajnicek AM, Morozov YM, Ross RA, Mulder J, et al. (2007) Hardwiring the brain: endocannabinoids shape neuronal connectivity. *Science* 316: 1212–1216.
- Argaw A, Duff G, Zabouri N, Cecyre B, Chaine N, et al. (2011) Concerted action of CB<sub>1</sub> cannabinoid receptor and deleted in colorectal cancer in axon guidance. *J Neurosci* 31: 1489–1499.
- Molina-Holgado F, Rubio-Araiz A, Garcia-Ovejero D, Williams RJ, Moore JD, et al. (2007) CB<sub>2</sub> cannabinoid receptors promote mouse neural stem cell proliferation. *Eur J Neurosci* 25: 629–634.
- Carrier EJ, Kearns CS, Barkmeier AJ, Breese NM, Yang W, et al. (2004) Cultured rat microglial cells synthesize the endocannabinoid 2-arachidonylglycerol, which increases proliferation via a CB<sub>2</sub> receptor-dependent mechanism. *Mol Pharmacol* 65: 999–1007.

18. Fernandez-Ruiz J, Romero J, Velasco G, Tolon RM, Ramos JA, et al. (2007) Cannabinoid CB<sub>2</sub> receptor: a new target for controlling neural cell survival? *Trends Pharmacol Sci* 28: 39–45.
19. Berrendero F, Sepe N, Ramos JA, Di Marzo V, Fernandez-Ruiz JJ (1999) Analysis of cannabinoid receptor binding and mRNA expression and endogenous cannabinoid contents in the developing rat brain during late gestation and early postnatal period. *Synapse* 33: 181–191.
20. Erskine L, Herrera E (2007) The retinal ganglion cell axon's journey: insights into molecular mechanisms of axon guidance. *Dev Biol* 308: 1–14.
21. Barres BA, Silverstein BE, Corey DP, Chun LL (1988) Immunological, morphological, and electrophysiological variation among retinal ganglion cells purified by panning. *Neuron* 1: 791–803.
22. Meyer-Franke A, Kaplan MR, Pflieger FW, Barres BA (1995) Characterization of the signaling interactions that promote the survival and growth of developing retinal ganglion cells in culture. *Neuron* 15: 805–819.
23. Bottenstein J, Sato G (1979) Growth of a rat neuroblastoma cell line in serum-free supplemented medium. *Proc Natl Acad Sci* 76: 514–517.
24. Clancy B, Darlington RB, Finlay BL (2001) Translating developmental time across mammalian species. *Neuroscience* 105: 7–17.
25. Robinson SR, Dreher B (1990) The visual pathways of eutherian mammals and marsupials develop according to a common timetable. *Brain Behav Evol* 36: 177–195.
26. Bhide PG, Frost DO (1991) Stages of growth of hamster retinofugal axons: implications for developing axonal pathways with multiple targets. *J Neurosci* 11: 485–504.
27. Ono M, Murakami T, Kudo A, Ishiki M, Sawada H, et al. (2001) Quantitative Comparison of Anti-Fading Mounting Media for Confocal Laser Scanning Microscopy. *J Histochem Cytochem* 49: 305–312.
28. Argaw A, Duff G, Boire D, Pito M, Bouchard JF (2008) Protein kinase A modulates retinal ganglion cell growth during development. *Exp Neurol* 211: 494–502.
29. Sholl DA (1953) Dendritic organization in the neurons of the visual and motor cortices of the cat. *J Anat* 87: 387–406.
30. Torborg CL, Feller MB (2004) Unbiased analysis of bulk axonal segregation patterns. *J Neurosci Methods* 135: 17–26.
31. Stevens B, Allen NJ, Vazquez LE, Howell GR, Christopherson KS, et al. (2007) The classical complement cascade mediates CNS synapse elimination. *Cell* 131: 1164–1178.
32. Bjartmar L, Huberman AD, Ullian EM, Renteria RC, Liu X, et al. (2006) Neuronal Pentraxins Mediate Synaptic Refinement in the Developing Visual System. *J Neurosci* 26: 6269–6281.
33. Demyanenko GP, Maness PF (2003) The L1 cell adhesion molecule is essential for topographic mapping of retinal axons. *J Neurosci* 23: 530–538.
34. Prather PL (2008) CB<sub>2</sub> Cannabinoid Receptors : Molecular, Signaling, and Trafficking Properties. In: *Cannabinoids and the Brain* (Köfalvi A, ed): 75–90. New York, NY: Springer.
35. Greenhough A, Patsos HA, Williams AC, Paraskeva C (2007) The cannabinoid delta(9)-tetrahydrocannabinol inhibits RAS-MAPK and PI3K-AKT survival signalling and induces BAD-mediated apoptosis in colorectal cancer cells. *Int J Cancer* 121: 2172–2180.
36. Jaworski J, Sheng M (2006) The growing role of mTOR in neuronal development and plasticity. *Mol Neurobiol* 34: 205–219.
37. Puighermanal E, Marsicano G, Busquets-Garcia A, Lutz B, Maldonado R, et al. (2009) Cannabinoid modulation of hippocampal long-term memory is mediated by mTOR signaling. *Nat Neurosci* 12: 1152–1158.
38. Bovolenta P (2005) Morphogen signaling at the vertebrate growth cone: a few cases or a general strategy? *J Neurobiol* 64: 405–416.
39. Kennedy TE, Serafini T, de la Torre JR, Tessier-Lavigne M (1994) Netrins are diffusible chemotropic factors for commissural axons in the embryonic spinal cord. *Cell* 78: 425–435.
40. Keino-Masu K, Masu M, Hinck L, Leonardo ED, Chan SSY, et al. (1996) Deleted in Colorectal Cancer (DCC) Encodes a Netrin Receptor. *Cell* 87: 175–185.
41. Shekarabi M, Moore SW, Tritsch NX, Morris SJ, Bouchard JF, et al. (2005) Deleted in colorectal cancer binding netrin-1 mediates cell substrate adhesion and recruits Cdc42, Rac1, Pak1, and N-WASP into an intracellular signaling complex that promotes growth cone expansion. *J Neurosci* 25: 3132–3141.
42. Ming G-I, Song H-j, Berninger B, Holt CE, Tessier-Lavigne M, et al. (1997) cAMP-Dependent Growth Cone Guidance by Netrin-1. *Neuron* 19: 1225–1235.
43. Bouchard JF, Moore SW, Tritsch NX, Roux PP, Shekarabi M, et al. (2004) Protein kinase A activation promotes plasma membrane insertion of DCC from an intracellular pool: A novel mechanism regulating commissural axon extension. *J Neurosci* 24: 3040–3050.
44. Bouchard J-F, Horn KE, Stroh T, Kennedy TE (2008) Depolarization recruits DCC to the plasma membrane of embryonic cortical neurons and enhances axon extension in response to netrin-1. *Journal of Neurochemistry* 107: 398–417.
45. Deiner MS, Kennedy TE, Fazeli A, Serafini T, Tessier-Lavigne M, et al. (1997) Netrin-1 and DCC mediate axon guidance locally at the optic disc: loss of function leads to optic nerve hypoplasia. *Neuron* 19: 575–589.
46. Godeмент P, Salaun J, Imbert M (1984) Prenatal and postnatal development of retinogeniculate and retinocollicular projections in the mouse. *J Comp Neurol* 230: 552–575.
47. Vitalis T, Laine J, Simon A, Roland A, Leterrier C, et al. (2008) The type 1 cannabinoid receptor is highly expressed in embryonic cortical projection neurons and negatively regulates neurite growth in vitro. *Eur J Neurosci* 28: 1705–1718.
48. Felder CC, Joyce KE, Briley EM, Mansouri J, Mackie K, et al. (1995) Comparison of the pharmacology and signal transduction of the human cannabinoid CB<sub>1</sub> and CB<sub>2</sub> receptors. *Mol Pharmacol* 48: 443–450.
49. Wahl S, Barth H, Ciossek T, Aktories K, Mueller BK (2000) Ephrin-A5 induces collapse of growth cones by activating Rho and Rho kinase. *J Cell Biol* 149: 263–270.
50. Yuan XB, Jin M, Xu X, Song YQ, Wu CP, et al. (2003) Signalling and crosstalk of Rho GTPases in mediating axon guidance. *Nat Cell Biol* 5: 38–45.
51. Rajnicek AM, Foubister LE, McCaig CD (2006) Temporally and spatially coordinated roles for Rho, Rac, Cdc42 and their effectors in growth cone guidance by a physiological electric field. *J Cell Sci* 119: 1723–1735.
52. Moore SW, Correia JP, Lai Wing Sun K, Pool M, Fournier AE, et al. (2008) Rho inhibition recruits DCC to the neuronal plasma membrane and enhances axon chemoattraction to netrin 1. *Development* 135: 2855–2864.
53. Lang P, Gesbert F, Delespine-Carmagnat M, Stancou R, Pouchelet M, et al. (1996) Protein kinase A phosphorylation of RhoA mediates the morphological and functional effects of cyclic AMP in cytotoxic lymphocytes. *EMBO J* 15: 510–519.
54. Ellerbroeck SM, Wennerberg K, Burridge K (2003) Serine phosphorylation negatively regulates RhoA in vivo. *J Biol Chem* 278: 19023–19031.
55. Qiao J, Huang F, Lum H (2003) PKA inhibits RhoA activation: a protection mechanism against endothelial barrier dysfunction. *Am J Physiol Lung Cell Mol Physiol* 284: L972–980.
56. Zhou D, Song ZH (2001) CB<sub>1</sub> cannabinoid receptor-mediated neurite remodeling in mouse neuroblastoma N1E-115 cells. *J Neurosci Res* 65: 346–353.
57. Chapman B (2000) Necessity for afferent activity to maintain eye-specific segregation in ferret lateral geniculate nucleus. *Science* 287: 2479–2482.
58. Monsul NT, Geisendorfer AR, Han PJ, Banik R, Pease ME, et al. (2004) Intraocular injection of dibutyl cyclic AMP promotes axon regeneration in rat optic nerve. *Exp Neurol* 186: 124–133.
59. Stella N, Schweitzer P, Piomelli D (1997) A second endogenous cannabinoid that modulates long-term potentiation. *Nature* 388: 773–778.
60. Sugiura T, Kodaka T, Kondo S, Tonegawa T, Nakane S, et al. (1996) 2-Arachidonoylglycerol, a Putative Endogenous Cannabinoid Receptor Ligand, Induces Rapid, Transient Elevation of Intracellular Free Ca<sup>2+</sup> in Neuroblastoma x Glioma Hybrid NG108–15 Cells. *Biochemical and Biophysical Research Communications* 229: 58–64.
